1 Periprotein membrane lipidomics and the role of lipids in transporter function  
2 in yeast

3

4 Joury S van 't Klooster<sup>a</sup>, Tan-Yun Cheng<sup>b</sup>, Hendrik R Sikkema<sup>a</sup>, Aike Jeucken<sup>a</sup>, D. Branch Moody<sup>b,c</sup> and  
5 Bert Poolman<sup>a,\*</sup>

6

7 <sup>a</sup>Department of Biochemistry, University of Groningen  
8 Groningen Biomolecular Sciences and Biotechnology Institute  
9 Nijenborgh 4, 9747 AG Groningen, The Netherlands

10

11 <sup>b</sup>Division of Rheumatology, Inflammation and Immunity  
12 Brigham and Women's Hospital, Harvard Medical School  
13 60 Fenwood Road, Boston, MA, 02115, USA.

14 <sup>c</sup>Department of Medicine, Harvard Medical School, Boston, MA, 02115, USA.

15

16 \*To whom correspondence should be addressed

17 E-mail: [b.poolman@rug.nl](mailto:b.poolman@rug.nl) or [bmoody@bwh.harvard.edu](mailto:bmoody@bwh.harvard.edu)

18

19

20 **Key words:** lipidomics, membrane transport, yeast plasma membrane, Eisosome

**Impact statement**

Membrane protein-specific lipidomics provides information on the organization of the yeast plasma membrane and the functioning of solute transporters

## 21 Abstract

22

23 The yeast plasma membrane is segregated into domains: the Micro-Compartment-of-Can1 (MCC)  
24 and Pma1 (MCP) have a different protein composition, but their lipid composition is largely  
25 unknown. We extracted proteins residing in these microdomains via stoichiometric capture of lipids  
26 and proteins in styrene-maleic-acid-lipid-particles (SMALPs). We purified SMALPs by affinity  
27 chromatography and quantitatively analyzed the lipids by mass spectrometry and their role in  
28 transporter function. We found that phospholipid and sterol concentrations are similar for MCC and  
29 MCP, but sphingolipids are enriched in MCP. Ergosterol is depleted from the periprotein lipidome,  
30 whereas phosphatidylserine is enriched relative to the bulk of the plasma membrane.  
31 Phosphatidylserine, non-bilayer lipids and ergosterol are essential for activity of Lyp1; the  
32 transporter also requires a balance of saturated/unsaturated fatty acids. We propose that proteins  
33 can function in the yeast plasma membrane by the disordered state of surrounded lipids and diffuse  
34 slowly in domains of high lipid order.

35

## 36 Introduction

37

38 The interior of the cell is separated from the exterior by a lipid bilayer.(1) Cells can have more than  
39 1,000 different lipid species, and the molecular composition at any point on a planar membrane, or  
40 in the inner and outer leaflets, differs. Eukaryotic membranes vary along the secretory pathway, and  
41 the plasma membrane is enriched in sphingolipids and sterols(2). Furthermore, the inner and outer  
42 leaflet of the plasma membrane of eukaryotic cells differ in lipid species: anionic lipids(3) and  
43 ergosterol(4) are enriched in the inner leaflet. Sphingolipids are more abundant in the outer leaflet  
44 as shown for mammalian cells. Within the membrane the lipids and proteins may cluster in domains  
45 of different composition(5).

46

47 Yeast and many other fungi tolerate a low external pH(6) and high solvent concentrations(7), which  
48 suggests a high degree of robustness of their plasma membranes. This correlates with observations  
49 that the lateral diffusion of proteins in the plasma membrane is extremely slow and the permeability  
50 for small molecules is low as compared to mammalian or bacterial membranes(8,9), suggesting high  
51 lipid order within the plasma membrane(10). In yeast, the lateral segregation of lipids is associated  
52 with a differing location of marker proteins. Of these, the Membrane Compartments of Pma1 (MCP)  
53 and Can1 (MCC)(11,12) are well studied. The proton-ATPase Pma1 strictly localizes to the MCP,  
54 whereas the amino acid transporters Can1 and Lyp1 localize to the MCP or MCC depending on the  
55 physiological condition(8,13). Many more proteins are associated with MCC and MCP, but the  
56 molecular basis of their partitioning is elusive(14). The MCC is part of a larger complex called the  
57 'Eisosome', which stabilizes the MCC membrane invaginations(15), leading to the term  
58 'MCC/eisosomes.' In terms of lipid composition, the MCP is believed to be enriched in sphingolipids  
59 and the MCC in ergosterol(10,16,17), but evidence for this partition is indirect and mainly based on  
60 fluorophore binding(17) and lipid-dependent protein trafficking(13). Attempts to accurately  
61 determine the lipids of the yeast plasma membrane after cell fractionation are hampered by  
62 impurities from other organellar membranes.

63

64 A recently developed method involving Styrene-Maleic-Acid (SMA) polymers(18) allows extraction of  
65 proteins from their native lipid bilayer. SMA-polymers form protein-lipid containing disc-shaped  
66 structures, called 'SMALPs', preserve the periprotein lipids or even more distant lipid shells  
67 depending on the disc-size. We adopted this method for direct, *in situ* detection of lipids that  
68 surround named membrane proteins, which minimizes contamination of lipids from other  
69 membrane compartments. We developed a three-step method whereby very small lipid shells are  
70 generated, hereafter called the periprotein lipidomes. Shells containing a named protein are  
71 captured, and lipids associated with each named protein are detected by lipidomics in defined

72 domains such as MCC and MCP. Finally, we used the lipidomics data to test the lipid dependence of  
73 amino acid transport by purified Lyp1 reconstituted in synthetic lipid vesicles.

74

## 75 Results

76

### 77 Approach to periprotein membrane lipidomics

78 We used SMA to extract transmembrane proteins with surrounding lipids from the plasma  
79 membrane to capture periprotein-lipid discs, called SMA-Lipid Particles SMALPs. This approach(19)  
80 avoids detergents normally needed to capture membrane proteins and selectively captures lipids  
81 within a disc of defined diameter of  $9 \text{ nm} \pm 1 \text{ nm}$ (18) (Fig. S1), which normally exceeds the area of  
82 most membrane proteins ( $\sim 20 \text{ nm}^2$ ), so we expected less than 5 concentric layers of lipid. Given the  
83 density of proteins in cells of  $\sim 3$  per  $100 \text{ nm}^2$  (20) versus a SMALP area of  $\sim 50 \text{ nm}^2$  (assuming SMA-  
84 polymer contributes 1 nm to the radius), we reasoned that most SMALPs would contain a single  
85 protein and lipid would be in moderate stoichiometric excess. These predictions based on the known  
86 cross-sectional area of lipids proteins and SMALPS estimate the SMA:protein:lipid of 1:1:60-120 (Fig.  
87 1). We refer to these lipids as the periprotein lipidome, which includes more than just the annular  
88 lipids; the latter are defined as lipids directly contacting the transmembrane domain.

89

90 We determined the lipidomes associated with Pma1, a genuine MCP resident, Sur7, a genuine MCC  
91 resident and the amino acid transporters Can1 and Lyp1, which cycle between MCP and MCC. Can1  
92 and Lyp1 leave the MCC and are internalized from the MCP when arginine (substrate of Can1) and  
93 lysine (substrate of Lyp1) are present in excess(8,21). At low concentrations of arginine and lysine,  
94 the Can1 and Lyp1 predominantly localize in the MCC (up to 60% of Can1 and Lyp1 molecules)(8). To  
95 trap Can1 and Lyp1 in the MCC and to obtain a better representation of protein-specific MCC lipids,  
96 we used a GFP-binding protein (GBP)(22) fused to the MCC resident Sur7 to specifically enrich for  
97 Lyp1-YPet and Can1-YPet proteins in the MCC (Fig. S2). The GFP-binding protein binds YPet with high  
98 affinity and sequesters YPet-tagged proteins, when Sur7-GBP is present in excess.

99

100 We engineered a C-terminal 10-His-tag to each of the proteins and used metal-affinity (Nickel-  
101 Sepharose) and size-exclusion chromatography for purification of SMALPs containing either Pma1-  
102 Ypet, Sur7-Ypet, Can1-YPet or Lyp1-YPet with measurable purity (Supplementary Figure 3A). SDS-  
103 PAGE analysis shows multiple protein bands (Fig. S3B), presumably due to proteolysis of protein  
104 loops during purification. Indeed, 2D native-denaturing gel electrophoresis shows that the vast  
105 majority of protein bands are genuine parts of Pma1-Ypet, Sur7-Ypet, Can1-YPet or Lyp1-YPet (Fig.  
106 S3C). Each protein migrates as a single band on a native gel and segregates into multiple bands when  
107 SDS is included in the 2<sup>nd</sup> dimension of the electrophoresis. Furthermore, MS analysis of proteins in  
108 SMALPs shows peptide coverage across the full-length amino acid sequence (Fig. S3D). Finally, MS  
109 analysis of lipids extracted by SMA polymer from synthetic lipids vesicles shows that the procedure  
110 does not bias towards the extraction of specific phospholipids (Fig. S4A), similar to prior  
111 observations of sphingolipids and sterols(23,24).

112

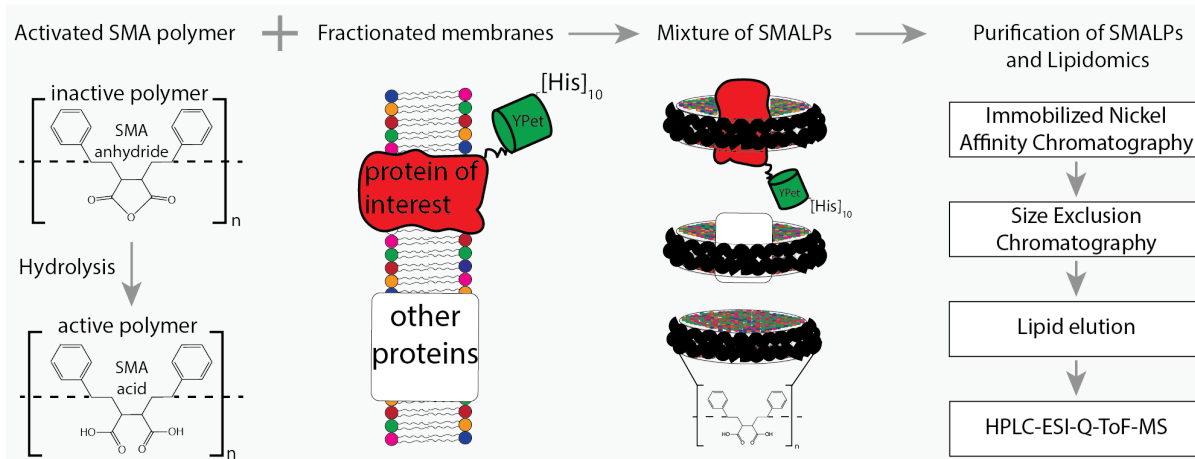

113  
114

115 Figure 1: Flowchart of SMALP isolation and lipidome analysis. Hydrolysis of SMA-anhydride gives SMA acid.  
116 Combining SMA with fractionated membranes results in SMALPs in which SMA (black ribbon) has encapsulated  
117 lipids and proteins. The initial mixture consists of SMALPs containing the protein of interest (red), other  
118 proteins (white box) or no protein at all. Purification of protein-specific SMALPs is done by Immobilized Nickel  
119 Affinity Chromatography (IMAC) and Size-Exclusion Chromatography (SEC). Next, lipids associated with  
120 SMALPs are determined by reversed-phase high-performance liquid chromatography (HPLC) coupled with  
121 electrospray ionization (ESI)-quadrupole-time-of-flight (Q-ToF) mass spectrometry (MS).

122

### 123 Lipidomics analysis of periprotein microdomains

124

125 Next, the SMALP-lipid-protein complexes were treated with a chloroform-methanol-water mixture  
126 (1:2:0.8)(25) to precipitate protein and SMA polymers in the interphase and capture membrane  
127 lipids in the organic phase. Lipid mixtures were analyzed by reversed-phase high-performance liquid  
128 chromatography (HPLC) coupled with Electrospray Ionization (ESI)-Quadrupole-Time-of-Flight (QToF)  
129 mass spectrometry. Initially we generated individual lipidomes of Pma1-MCP and Sur7-MCC by  
130 comparing the lipid eluents from SMALP-protein to SMA polymer only. To detect lipid and small  
131 molecule contaminants associated with SMA, we performed negative mode comparative  
132 lipidomics(26) of SMALP-Pma1 and SMA polymer alone (Fig. 2A), which generated 815 unique ions.  
133 This documented sensitive and broad lipid detection with very low background from SMA alone, in  
134 agreement with prior analyses of conventional lipid binding proteins(27,28).

134

135 Next we sought to identify and remove false positive or redundant signals. Building on previously  
136 reported methods for analysis of protein-lipid complexes(28–30), we implemented data filters for  
137 lipids in protein-SMALP complexes. First, ions were considered highly Pma1-specific when signals  
138 were 10-fold higher than for SMA polymer alone. 511 ions passed this stringent criterium, whereas 3  
139 signals were preferentially found with SMA polymer, demonstrating a low false positive lipid binding  
140 to SMALPs. We further enriched for high value hits by censoring ions present in solvents or  
141 recognizable as inorganic salt clusters based on low mass defects. We removed ions representing  
142 redundant detection of lipids as isotopes, alternate adducts and dimers [2M] (Fig. 2B). The combined  
143 effects of these filters returned 79 high quality molecular events, representing distinct retention  
144 times or  $m/z$  values.

145

146 Yet, 79 lipids still exceeded our capacity to identify them with targeted collision-induced dissociation  
147 (CID) MS, so we used a grouping technique whereby all molecules are plotted according to retention  
148 time and mass (Fig. 2C). This simple technique yields clusters comprised of lipids with the same  
149 underlying general structure with nearly co-eluting chain and unsaturation variants, represented as  
150 X:Y. Next, we solved the lead compound for key groups by CID-MS. Matching the accurate mass,  
151 retention time, and CID-MS patterns (Fig. 2B, C, and D) to standards, we identified 58 molecules in  
152 eight lipid classes, including 10 molecular species of phosphatidylinositol (PI; lead molecule,  $m/z$



153 835.5361, 34:1), 11 phosphatidylcholines (PC; lead molecule  $m/z$  804.5771, 34:1), 10  
154 phosphatidylethanolamines (PE;  $m/z$  716.5251, 34:1), 5 phosphatidylserines (PS; lead molecule  $m/z$   
155 760.5148, 34:1), 2 phosphatidylglycerols (PG; lead molecule  $m/z$  719.4889, 32:1), 2 phosphatidic  
156 acids (PA; lead molecules  $m/z$  671.4673, 34:2 PA), 9 cardiolipins (CL; lead molecule  $m/z$  1399.960,  
157 68:4), and 7 diacylglycerols (DAG; lead molecule  $m/z$  639.5224, 34:1). Although we were unable to  
158 detect mannosyl-diinositolphosphoceramide (M(IP)<sub>2</sub>C), we did identify an ion matching  
159 inositolphosphoceramide (IPC,  $m/z$  952.6846, 44:0) and mannosyl-inositolphosphoceramide (MIPC,  
160  $m/z$  1114.7340, 44:0) (Figure 2B). The identification of these yeast lipids was confirmed by the CID-  
161 MS (Fig. 2D).

162

163 The lipidomic profile of SMALP-Sur7 was generated by the same approach as described for SMALP-  
164 Pma1. For SMALP-Sur7, we identified 36 of 50 high quality ions, including 8 PIs, 10 PCs, 5 PEs, 7 PSs,  
165 2 CLs, and 4 DAGs (Fig. S5) Despite the different background strains of Pma1 and Sur7, many of the  
166 same phospholipid species were found in both SMALP-protein complexes.

167

168 Given the high specificity for protein pull down and the lack of substantial adherence of lipids to  
169 SMA polymers alone, the lipids identified are likely the molecules that surround the transmembrane  
170 sequences of Pma1 and Sur7. For other SMALPs: Can1-MCP, Can1-MCC, Lyp1-MCP, and Lyp1-MCC,  
171 we carried out targeted lipidomic analysis based on the ions identified from both SMALP-Pma1 and  
172 SMALP-Sur7 lipidomes, which includes 7 classes of phospholipids, 2 types of sphingolipids, and  
173 ergosterol (supplemental table S2).

174

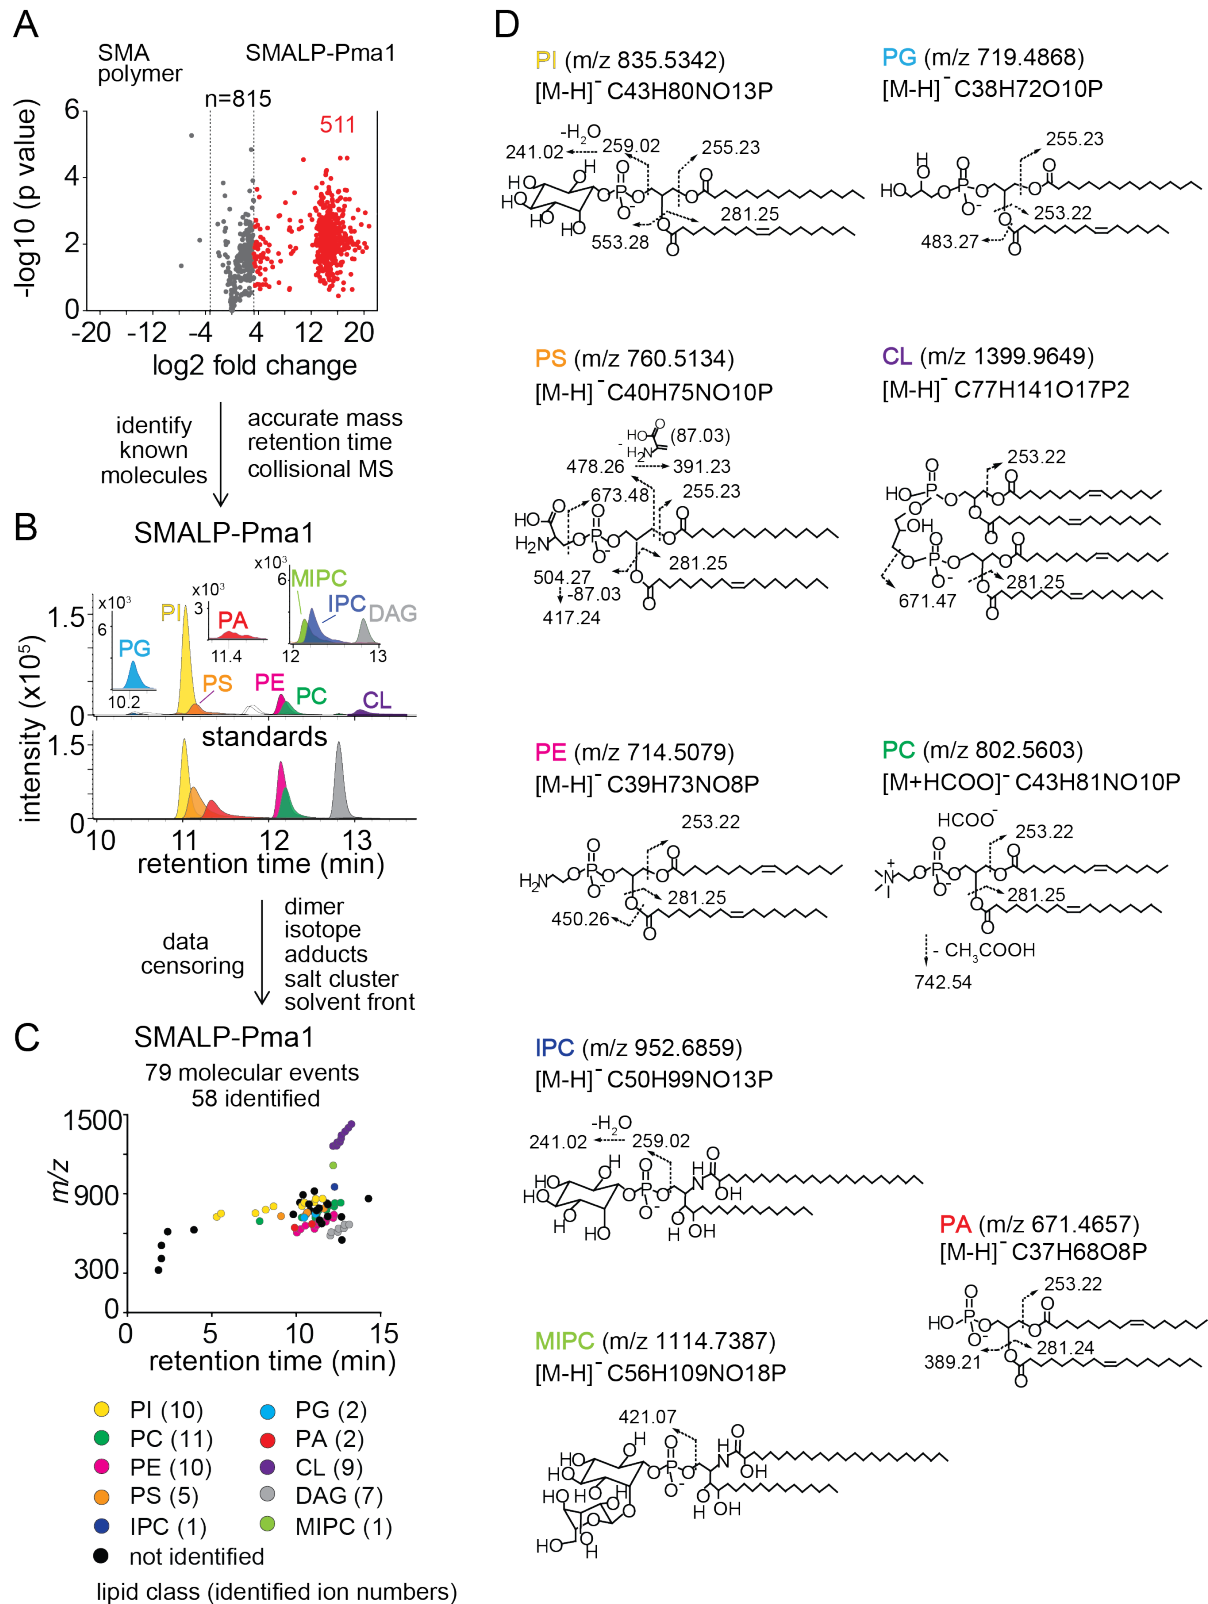

175  
176  
177  
178  
179  
180  
181  
182

Figure 2. Lipidomics of SMALPs. (A) Three independently purified samples of SMALP-Pma1 obtained from yeast cells were subjected to lipid extraction, and 1  $\mu$ M of the input protein was used to normalize lipid input for the reversed phase HPLC-QToF-ESI-MS in the negative ion mode. Ions were considered enriched for the SMALP-Pma1 when the intensity was at least 10-fold higher compared to the control. (B-C) Common lipids, including PI, PC, PS, PE, PG, PA, CL, DAG, IPC, and MIPC, were found based on the accurate mass, retention time or collisional MS pattern match to the synthetic standards. Chain length and unsaturation analogs were

183 identified, whereas the redundant ions such as isotopes, lipid dimers, alternate adducts, and salt clusters were  
184 removed from the enriched ion pool. (D) Negative mode CID-MS from each lipid class identified diagnostic  
185 fragments. Molecular variants with altered chain length and unsaturation within each class were deduced  
186 based on mass intervals corresponding to CH<sub>2</sub> or H<sub>2</sub> hydrogens (not shown).

187

### 188 **Sphingolipids and ergosterol in MCC versus MCP domains**

189 Ergosterol is a major component of the yeast plasma membrane. Unlike membrane phospholipids  
190 and sphingolipids that form anions, ergosterol is a neutral species that is rarely detected in negative  
191 mode lipidomics. However, in the positive mode we could detect the protonated ion [M+H]<sup>+</sup> at *m/z*  
192 397.3464, which matched the expected mass of ergosterol and had the same retention time as the  
193 ergosterol standard. MCC domains are thought to be enriched in ergosterol and sphingolipids are  
194 relatively excluded. To test this hypothesis directly, we compared the lipidomic profiles with regard  
195 to inositol-phosphoceramide (IPC), mannosyl-inositol-phosphoCeramide (MIPC) and ergosterol (Fig.  
196 3A and S6A)). We did not initially detect IPC and MIPC in the computerized high throughput analysis  
197 of Sur7 lipidomes. These ions were missed by automated peak-picking algorithms, likely due to their  
198 very low intensity and nearby background signals. However, manual examination of ion  
199 chromatograms that focused on the mass of these two molecules in HPLC-MS convincingly detected  
200 chromatographic peaks allowing the quantitative assessment of MIPC and IPC. Unlike other lipids  
201 analyzed, standards for MIPC and IPC were not available, so we could not directly determine their  
202 molar abundance from MS signals. However, using ergosterol as an internal control, we found ~4-  
203 fold decrease in MIPC/Ergosterol and IPC/ergosterol ratios (Fig. 3B and C) in the SMALP-Sur7-MCC  
204 compared to the SMALP-Pma1-MCP. Here, the MS signals for ergosterol are similar for Sur7-MCC  
205 and Pma1-MCP, but IPC and MIPC MS signals are different. We found similar results for Lyp1-MCP  
206 but for Can1-MCP the ratios were not significantly reduced (Fig. S6). These ratios were consistent  
207 with the conclusion that MCC-Sur7 domains have reduced sphingolipids as compared to MCP-Pma1,  
208 but inconsistent with MCC-Sur7 periprotein domains being enriched in ergosterol(16,17). Separately,  
209 we performed ergosterol staining by filipin in our cells using Sur7-Ypet as reporter of  
210 MCC/eisosomes and did not find enhanced filipin fluorescence at the MCC domains (Fig. S7).

211

### 212 **Quantitative lipid analysis of SMALPs**

213 From the overall lipidomes of MCC-Pma1 and MCP-Sur7, we found that many lipid species are  
214 detected in both domains. Next, we investigated whether the protein-associated domains vary in  
215 phospholipids whose enrichments and roles in these domains are unknown. We estimated the lipid  
216 quantity by comparing the peak areas of ion chromatograms to the external standard curves for PI  
217 (34:1), PC (34:1), PE (34:1), PS (34:1), PG (36:1), PA (34:1), CL (72:4), and ergosterol (Fig. S8A).  
218 Ranking the lipids by yield, we found the most abundant lipid species are PC, PI, PE, PS, and  
219 ergosterol with minor quantities of PG, PA and cardiolipin (Fig. 4A).

220

221 We calculated the molar ratio of phospholipids and ergosterol associated with each SMALP-protein,  
222 assuming 1:1 stoichiometry of SMALP to protein. The estimated average numbers of phospholipids  
223 plus ergosterol per SMALP-protein complex are 52, 66, 70, and 87 associated with Sur7, Can1, Lyp1,  
224 and Pma1, respectively, which is proportional to the protein sizes (Fig. 4B). From these ratios, we  
225 estimate 1-2 rings of lipid around each protein. Since the injection amount for lipid analysis was  
226 normalized based on the same molar amount of the input protein, the smaller protein size of Sur7  
227 could associate with less lipids and cause the fewer total ions detected in the SMALP-Sur7. However,  
228 due to variation among three independently purified SMALP-protein complexes, the protein size  
229 dependent lipids association did not reach statistical significance.

230

231 For the lipid class composition, we focused on the 4 major phospholipids and ergosterol regarding  
232 their relative abundance (Fig. 4C). To obtain better estimates of lipid quantities, we calculated  
233 conversion factors obtained from external standards and the standard addition method, which relies  
234 on true internal standards (Fig. S8 B-D). SMALPs containing Pma1, Can1, and Lyp1 were purified

235 from the Y8000 strain, whereas SMALP-Sur7 were purified from Y5000 strain. Therefore, the total  
236 plasma membrane extracts of these two strains were also analyzed separately (Fig. 4D). We found  
237 that Y8000 samples, including Pma1-MCP, Lyp1-MCP, Lyp1-MCC, Can1-MCP, and Can1-MCC consist  
238 of similar compositions of PC (~40%), PI (~20%), PE (~18%), PS (~16%) and ergosterol (~4%) (Fig. 4C).  
239 We also noticed that for the overall (plasma) membrane of strains Y5000 and Y8000, ergosterol (25-  
240 30 mol%) is 6-fold (Fig. 4D) higher than in the SMALPs, which suggests that ergosterol is depleted  
241 from the periprotein lipidome and more abundant in the bulk lipids surrounding the MCC and MCP  
242 proteins. Similarly, we observe 2 to 3-fold higher PS in all SMALP samples compared to overall  
243 (plasma) membrane, indicating that PS is enriched in the periprotein lipidome.

244

245 For the fatty acyl chain distribution, we found slight differences between strains. However, for both  
246 strains, we observed the similar fatty acyl chain distribution patterns in the four major phospholipid  
247 classes, as compared between the SMALP-protein associated lipids and their parent strain overall  
248 plasma membrane lipids (Fig. 4E and S9). We detected 11 forms of PC, 10 PIs, 10 PEs, and 7 PSs. We  
249 found C34:2 as major acyl chain for PE and PS and C32:2 and C34:1 for PC and PI, respectively.

250

251 In conclusion, periprotein lipidomes from SMALPs differ from the overall plasma membrane in  
252 ergosterol and PS content. Furthermore, the relative abundance of IPC and MIPC vary between the  
253 MCC and MCP, whereas differences in the major membrane phospholipids are small and not  
254 significant.

255

256

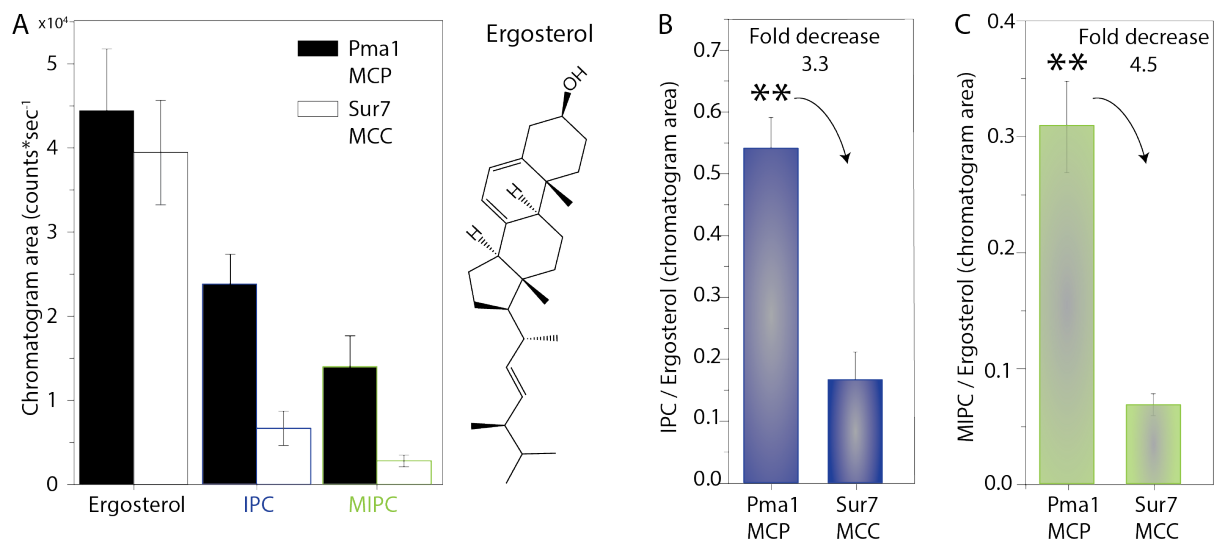

257  
258 Figure 3: Ratios of ergosterol over sphingolipids in MCP and MCC. (A) Peak areas of ergosterol, Inositol-  
259 PhosphoCeramide (IPC) and Mannosyl-Inositol-PhosphoCeramide (MIPC) for Pma1 (MCP) and Sur7 (MCC) and  
260 structure of Ergosterol. (B) Ratio of IPC/Ergosterol for Pma1 (MCP) and Sur7 (MCC). (C) Ratio of  
261 MIPC/Ergosterol for Pma1 (MCP) and Sur7 (MCC). Number of biological replicate experiments (n) = 3, the data  
262 are presented as mean +/- standard error. P value was calculated using Student's t-test. \*\*, P < 0.005.

263

264

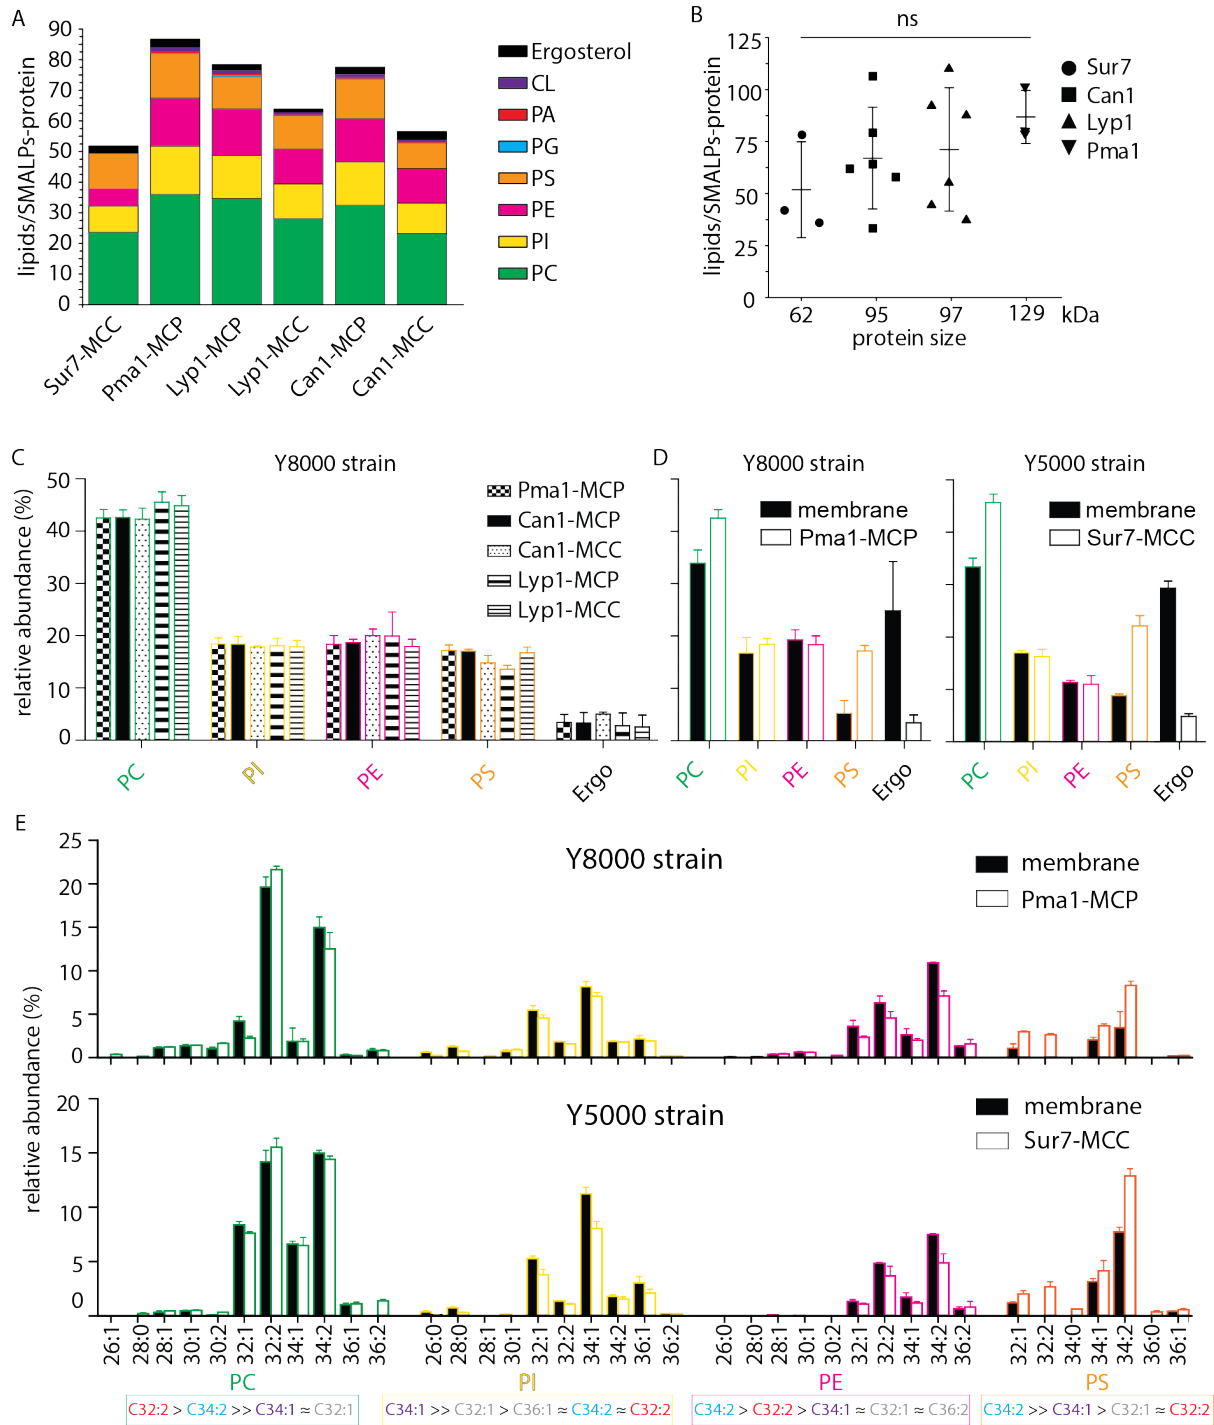

265  
266

267 **Figure 4: Phospholipids of SMALPs.** (A) Number of lipid species per SMALP. (B) Total number of lipids per  
268 SMALP for each protein plotted against molecular weight of the protein, excluding the YPet moiety. (C)  
269 Relative abundance per lipid class for each SMALP. (D) Relative abundance of lipids for total plasma membrane  
270 extracts of Y8000- & Y5000-strain. (E) Phospholipid composition of the MCP and MCC. C = carbon, 1<sup>st</sup> number =  
271 cumulative length of two acyl chains, 2<sup>nd</sup> number = cumulative number of double bonds of two acyl chains.  
272 Phospholipid two-letter abbreviations, including color-coding: PC = PhosphatidylCholine, PE =  
273 PhosphatidylEthanolamine, PS = PhosphatidylSerine and PI = PhosphatidylInositol. Number of biological  
274 replicate experiments (n) = 3; error bars are Standard Error of the Mean (SEM).  
275

276

#### 276 Phospholipid dependence of transporter function

277 Next, we sought to validate possible functional implications of the lipidomics data by testing the lipid  
278 dependence of Lyp1, using membranes formed from synthetic lipids. We previously reconstituted

279 Lyp1 in lipid vesicles composed of yeast total lipid extract(31). The yeast sphingolipids IPC and MIPC  
280 and certain headgroup-acyl chain combinations of the phospholipids are not available, but we could  
281 design artificial membranes that otherwise mimic those found in cells. In initial experiments with  
282 ergosterol present we observed that C34:1 (C18:1 plus C16:0 chains) palmitoyl-oleoyl-*sn*-  
283 phosphatidylX (POPX, where X=choline, ethanolamine, glycerol or serine), support a much higher  
284 transport activity than the most commonly used C36:2 forms or when C32:0 dipalmitoyl-*sn*-  
285 phosphatidylX (DPPX; C32:0 = 2 C16:0 chains) lipids (Fig. S10A) were used. When we exploit the  
286 lipidomics data and prepare vesicles with the dominant acyl chains for each lipid species using C32:2  
287 PC and PE and C34:1 PS, which is the second most abundant PS, we also find low transport activity  
288 (Fig. S10B). Hence, we started with a mixture of POPS, POPG, POPE and POPC (17.5 mol% each) plus  
289 30 mol% ergosterol (Fig. 5C, sample 1) and used that to benchmark the activity of Lyp1 in vesicles  
290 against the effects of phospholipids and sterols.

291  
292 To drive the import of lysine by Lyp1, we impose a membrane potential ( $\Delta\Psi$ ) and pH gradient ( $\Delta\text{pH}$ )  
293 by diluting the vesicles containing K-acetate into Na-phosphate plus valinomycin. The magnitude of  
294 the driving force is determined by the potassium and acetate gradient (Fig. S11A). Typically, we use a  
295  $\Delta\Psi$  and  $-\Delta\text{pH}$  of -81 mV each ( $Z=58$  mV), producing a proton motive force of -162 mV. We  
296 compared the lipid composition of the Lyp1 vesicles with the starting mixture for the reconstitution,  
297 using mass spectrometry, and do not find significant differences (Fig. S4B). This rules out enrichment  
298 or depletion of certain lipids during membrane reconstitution, including the possibility that co-  
299 purified protein lipids contribute significantly to the lipid pool. Furthermore, proton permeability  
300 measurements indicate that the transport rates are not skewed by large differences in proton  
301 leakage (Fig. S12). Hence, the proton motive force is similar in vesicles of different lipid composition.

302  
303 Supplementary Figure S11B shows the import of lysine over time, from which the slope estimates  
304 the initial rate of transport. Figure 5C shows that increasing either POPS or POPE increases transport  
305 activity (samples 2 and 3), while reducing the fraction of these lipids decreases the activity (samples  
306 5 and 6) relative to that in the benchmark mixture (sample 1). Increasing the fraction of POPG or  
307 lowering of POPC (sample 4) had no negative effect on transport. This suggests that the non-bilayer  
308 lipid POPE and the anionic lipid POPS are a minimal requirement for transport (sample 7).

309



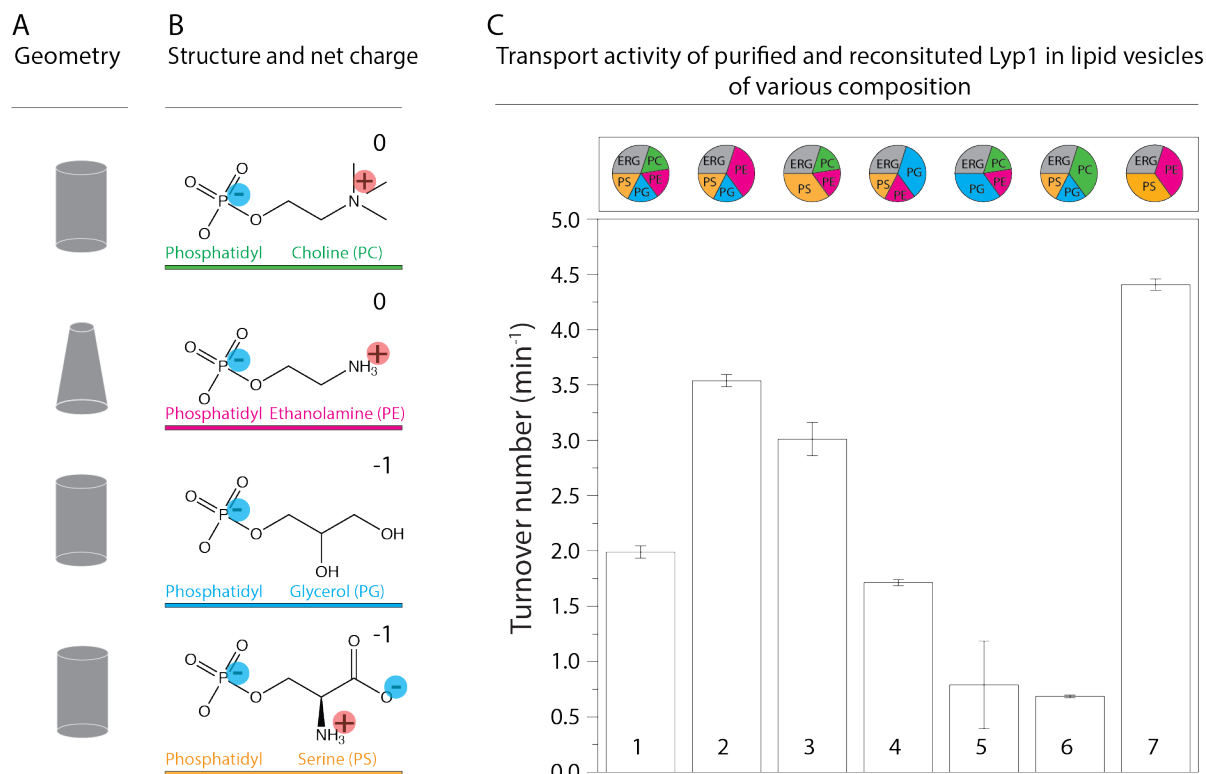

310  
 311 Figure 5: Lyp1 activity as a function of lipid composition. (A) is the geometric representation of lipids for the  
 312 headgroups shown in B. (B) shows Headgroups of phospholipids and color-coding with the net charge of the  
 313 lipids at neutral pH. (C) shows the turnover number of Lyp1p in different lipid mixtures with C34:1 (PO) acyl  
 314 chains, where the composition (mol%) of each sample is visualized by pie-graphs, using the color coding of (B).  
 315 The quantity of ergosterol was kept at 30 mol% in all mixtures. Data based on 3 replicate experiments; the  
 316 bars show the standard error of the fit.

317

### 318 The role of anionic lipids

319 Next, we simplified the lipid mixture by preparing vesicles composed of POPS, POPE and Ergosterol  
 320 (Fig. 5C, sample 7) and step-wise reduced the quantity of PS. We found a sigmoidal relationship  
 321 between Lyp1 activity and POPS concentration (Fig. 6A), which is indicative of cooperativity and  
 322 suggests that more than one molecule of POPS is needed for activation of Lyp1. The anionic lipid  
 323 POPG can only partly substitute for POPS (Fig. 5C, sample 5).

324

325

326  
327

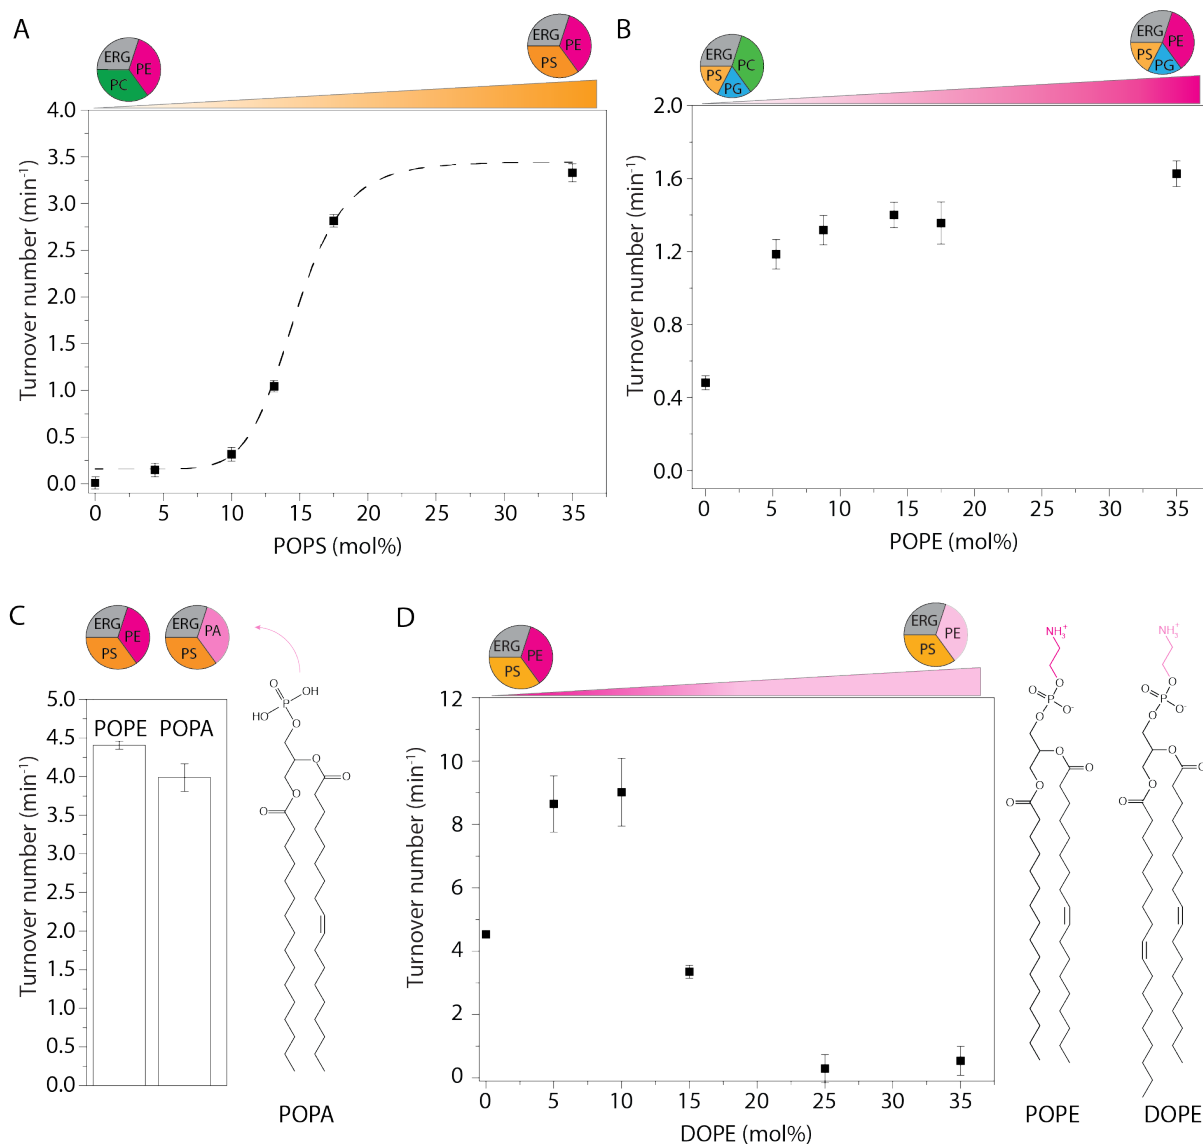

328  
329  
330  
331  
332  
333  
334  
335  
336  
337

Figure 6: Effect of anionic and non-bilayer lipids on Lyp1 activity in proteoliposomes. (A) Turnover number of Lyp1p as a function of POPS (1-palmitoyl-2-oleoyl-*sn*-glycero-3-phosphoserine). (B) Turnover number of Lyp1 as a function of POPE (1-palmitoyl-2-oleoyl-*sn*-glycero-3-phosphoethanolamine) (mol%). (C) Turnover number of Lyp1 in vesicles with POPE versus POPA (1-palmitoyl-2-oleoyl-*sn*-glycero-3-phosphatidic-acid). (D) Turnover number of Lyp1 as a function of DOPE, which was increased at the expense of POPE. The triangles at the top of each graph depict the gradual replacement of one lipid for another. Number of replicate experiments (n) = 3; the bars show the standard error of the fit of n = 1; variation between replicate experiments is within 20%. Sigmoidal curves were fitted using the equation:  $y = start + (end - start) \frac{x^n}{k^n + x^n}$

### 338 The role of non-bilayer lipids

339 Many phospholipids have a cylindrical geometry that allow bilayer formation with a single lipid  
340 species. The relatively small headgroup of PE, as compared to the acyl chains, results in cone  
341 geometry that does not allow bilayer formation from pure PE. PE and other non-bilayer lipids affect  
342 the lateral pressure profile and membrane curvature more drastically than bilayer forming lipids  
343 do(32). We determined the PE dependence of Lyp1 by increasing the fraction of POPE at the  
344 expense of POPC (Fig. 6B). Lyp1 transport activity increases 3-fold with increasing POPE and  
345 saturates at ~10 mol%. To determine whether the ethanolamine headgroup or the geometric shape  
346 of the lipid is important, we substituted POPE for POPA (Fig. 6C), a non-bilayer forming conical

347 phospholipid devoid of the headgroup moiety in PE (Fig. 5A). POPA can fully substitute POPE in  
 348 transporter activity, which suggests that some lipids with non-bilayer properties are important for  
 349 Lyp1 function. Next, we titrated in DOPE at the expense of POPE to gradually increase the degree of  
 350 acyl chain unsaturation (Fig. 6D). We observe a 2-fold increase in Lyp1 activity with DOPE at 5 to 10  
 351 mol% and POPE at 30 to 25 mol%, but a further increase in dioleoyl at the expense of palmitoyl-  
 352 oleoyl chains decreases the activity to zero. These experiments indicate that specific features of the  
 353 acyl chains (or fluidity) are as important as the geometric shape of non-bilayer lipids.  
 354

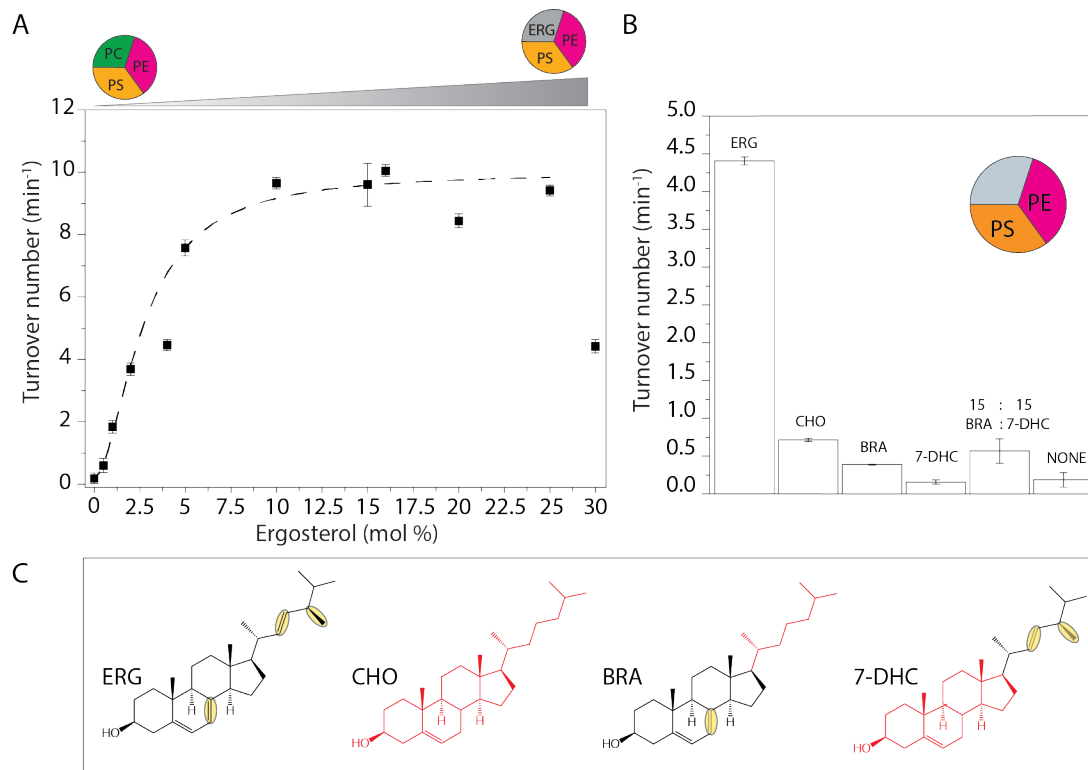

355  
 356  
 357 Figure 7: Effect of sterols on Lyp1 activity. (A) Turnover number of Lyp1 as a function of the quantity of  
 358 ergosterol in the vesicles. (B) Turnover number of Lyp1 as a function of the type of sterol. (C) Structures of  
 359 sterols; ERG = Ergosterol; CHO = Cholesterol; BRA = Brassicasterol; 7-DHC = 7-Dehydrocholesterol. ERG and  
 360 CHO parts are black and red respectively. Structural dissimilarities between ERG and CHO are highlighted by  
 361 yellow ovals. Number of biological experiments (n) = 3, variation between n = ± 20% therefore shown n = 1. The  
 362 Error bars are the standard error of the fit of n = 1.  
 363

### 364 Ergosterol is essential for Lyp1 activity

365 Ergosterol is the major sterol of lower eukaryotes and present in the yeast plasma membrane at  
 366 concentrations of ≈ 30 mol%(33), but the fraction of ergosterol in the periprotein lipid shell of Lyp1  
 367 (and Can1, Pma1 and Sur7) appears 6-fold lower than in the bulk membranes (Fig. 4B). We increased  
 368 the fraction of ergosterol at the expense of POPC and observed an increase in activity up to 10  
 369 mol%. Without ergosterol, Lyp1 is not active and the activity drops above 25 mol% (Fig. 7A). As with  
 370 POPS we find a sigmoidal dependence but the apparent cooperativity is much lower. Cholesterol  
 371 supports less than 15% of Lyp1 activity as compared to ergosterol. Ergosterol differs from  
 372 cholesterol in that it has two additional double bonds at positions C7-8 and C22-23 and one extra  
 373 methyl group at C24 (Fig. 7C yellow ovals). To find out which of these is important for transport  
 374 activity, we tested brassicasterol and dehydrocholesterol and an equal mixture of both (Fig. 7C). The  
 375 two sterols and the mixture thereof cannot substitute for ergosterol (Fig 7B).  
 376

377 In summary, anionic lipids with saturated and unsaturated acyl chains, preferably POPS, and  
 378 ergosterol are essential for Lyp1 functioning, and both lipid species stimulate transport

379 cooperatively. This suggests that “allosteric” sites on the protein need to be occupied by specific  
380 lipids to enable transport.

381

### 382 **Model for protein functioning in a highly ordered yeast PM**

383

384 The periprotein lipidomes and published literature lead to a new testable model (Fig. 8) of how  
385 proteins may function in a membrane of high lipid order, slow lateral diffusion and low  
386 permeability(8,9,14,34). We observe that membrane proteins like Lyp1 require a relatively high  
387 fraction of lipids with one or more unsaturated acyl chains that allow sufficient conformational  
388 flexibility of the proteins. The proteins with periprotein lipidome are embedded in an environment  
389 of lipids that are enriched in ergosterol and possibly saturated long-chain fatty acids such as present  
390 in IPC, MIPC and M(IP)<sub>2</sub>C, which yield a highly liquid-ordered state. The ordered state forms the  
391 basis for the robustness of the organism to survive in environments of low pH or and high solvent  
392 concentration(6,7) and likely explains the slow lateral diffusion and the low permeability of the yeast  
393 plasma membrane (Fig. 8).

394

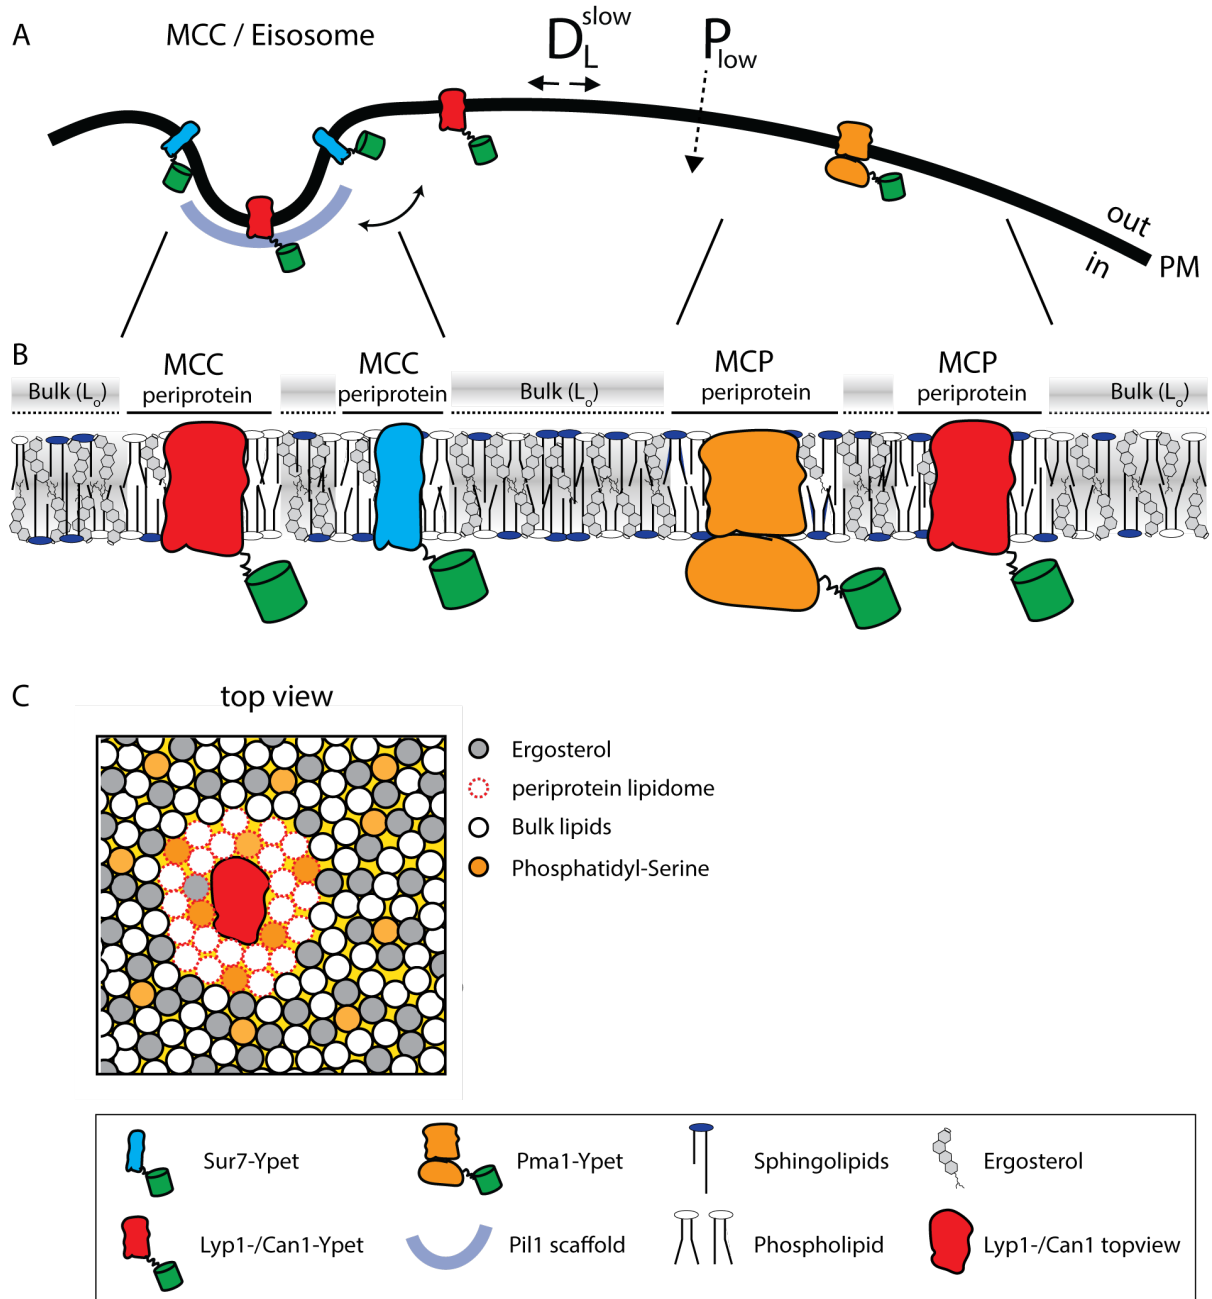

395  
396

397 Figure 8: Model of the yeast plasma membrane. (A) The MCC/Eisosome is stabilized by a scaffold of Pil1  
398 molecules. Sur7 strictly resides at the rim of the MCC/Eisosome, while Lyp1 and Can1 can diffuse in and out.  
399 Pma1 cannot enter the MCC/eisosome and resides in the MCP. (B) Schematic representation of the lipid  
400 composition of the MCC/Eisosome and the MCP based on the periprotein lipidome detected for Sur7 and  
401 Pma1, respectively. Here, phospholipids and ergosterol are similar, but sphingolipids are enriched in the MCP.  
402 The Bulk is enriched in ergosterol and represent lipids excluded from the periprotein lipidome. (C) Top view of  
403 part of the plasma membrane showing Lyp1 or Can1 enriched in phosphatidyl-serine and depleted in  
404 ergosterol as periprotein lipidome; the proteins surrounded by these periprotein lipidome diffuse very slowly  
405 in the bulk of lipids which is in a highly ordered state due to the high fraction of ergosterol.  $D_L^{slow}$  = slow lateral  
406 diffusion of proteins,  $P_{low}$  = low permeability of solutes,  $L_o$  = liquid ordered PM = plasma membrane.

407

408 How can transporters like Lyp1 function in such a membrane? The majority of transporters in the  
409 plasma membrane of yeast belong to the APC superfamily, including Lyp1 and Can1, or the Major  
410 Facilitator Superfamily (Hxt6, Gal2, Ptr2). These proteins undergo conformation changes when  
411 transiting between outward and inward conformations, which would be hindered in a highly liquid-

412 ordered membrane, where lipids will have to be displaced when the protein cycles between the  
413 outward- and inward-facing state. To obtain an estimate of the number of displaced lipids needed  
414 for such a conformational change, we analyzed the X-ray structures of the Lyp1 homolog LeuT in  
415 different conformations(35). We analyzed structures oriented in the membrane from the OPM  
416 database(36), which positions proteins in a lipid bilayer by minimizing its transfer energy from water  
417 to membrane. We have used a numerical integration method to estimate the surface area of the  
418 outward and inward state of LeuT in the plane of the outer- and inner-leaflet at the water  
419 membrane interface (Fig. 9). We estimated the number of lipids in the vicinity of the protein by  
420 drawing an arbitrary circle around the protein. With a radius of 35 ångström from the center of the  
421 protein we need 43 to 50 lipids per leaflet depending on the conformation. For the inner-leaflet, the  
422 inward-to-outward movement of LeuT requires plus three lipids and for the outer-leaflet minus  
423 three lipids, which can probably be accommodated by local changes in membrane  
424 compressibility(37) and by redistribution of the annular and next shell of lipids even if they are  
425 surrounded by membrane that is in a highly liquid-ordered state. We find similar changes in the  
426 numbers of lipids when we analyze different conformations of membrane transporters of the MFS  
427 (not shown). Although the difference in number of lipids is small (plus or minus three), the  
428 projections in figure 9 show that the conformational changes require significant lateral displacement  
429 of lipids in both inner- and outer-leaflet. Hence, the degree of acyl chain unsaturation and low  
430 ergosterol concentration is in line with the flexibility that is needed for the conformational changes.  
431

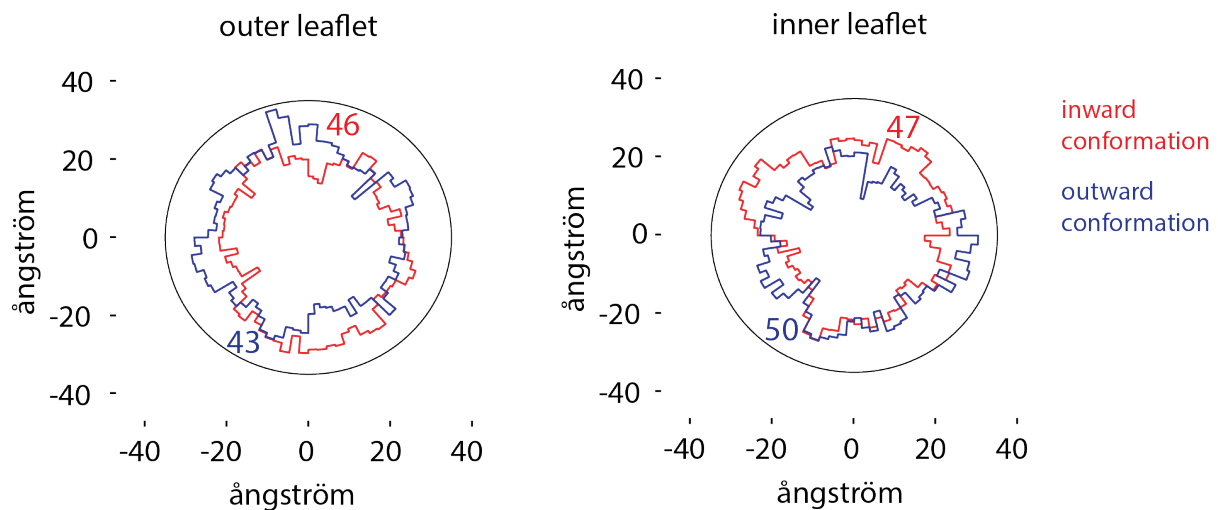

432  
433

434 Figure 9: Number of lipids in inner- and outer-leaflet for the inward and outward conformation of LeuT.  
435 Protein structures were positioned in a lipid bilayer by the OPM database(36). The OPM database positions  
436 proteins in a lipid bilayer by minimizing its transfer energy from water to membrane. Shown are projections of  
437 the area occupied by inward (red), outward (purple) conformation of the protein and both projections  
438 overlaid. We have drawn a circle of 70 ångström in diameter, which represents 1-2 lipid shells based on an  
439 average area per lipid of 0.471 nm<sup>2</sup>(38). Finally, the number of lipids in the outer- and inner-leaflet were  
440 calculated from the difference in surface area of the circle and the protein surface.

441

## 442 Discussion

443 Using a new method to directly quantitate individual lipids that surround named proteins, we show  
444 that the membrane proteins extracted from the MCC and MCP domains do not differ much in  
445 periprotein phospholipid and ergosterol composition, but do differ significantly in sphingolipid  
446 content. Furthermore, we find a much lower fraction of ergosterol and an enrichment of PS in the  
447 lipidome associated with Can1, Lyp1, Pma1 and Sur7 than in the surrounding bulk lipids. Assuming  
448 one protein per SMALP, we find between 52 to 87 lipids per protein. The number of lipids increases  
449 when sphingolipids are included and agrees with estimates reported in the literature(18). Calculated  
450 from the estimated perimeter of Lyp1 homolog LeuT, the number of lipids corresponds to 1-2 shells



451 of lipids surrounding the protein in the SMALP. Hence, we conclude that the SMA extraction targets  
452 the periprotein lipidome of membrane proteins. Our *in vitro* analysis of the activity of the amino acid  
453 transporter Lyp1 reveals the requirements of the protein for specific lipids, and the optimal  
454 conditions require a stringent degree of acyl chain saturation, and amounts of anionic lipids (>15  
455 mol%), non-bilayer lipids (>10 mol%) and ergosterol (5 mol%), which match the observed lipids in  
456 the HPCL-MS analysis. Except for phosphatidylserine we do not find a strong effect of a specific lipid  
457 headgroup on the activity of Lyp1.

458

459 When we benchmark our *S. cerevisiae* lipidomic data to other studies of the yeast plasma membrane  
460 we find similar, small quantities of PA, CL and PG(39–42). Thus, the majority of protein is extracted  
461 from the plasma membrane rather than from internal membranes. In terms of selectivity, we benefit  
462 from the ability to trap Can1 and Lyp1 in MCC/eisosomes, taking advantage of the GFP-binding  
463 protein(22) and the fact that we purify proteins using an affinity tag. Thus, our approach for lipid  
464 analysis is much less hampered by contamination with internal membranes than conventional  
465 fractionation studies. The SMALP technology only identifies protein specific lipidomes and does not  
466 report the overall composition of the plasma membrane.

467

468 Reported values for the average degree of acyl chain unsaturation for the plasma membrane of  
469 yeast vary. The values we find in our SMALPs are consistent with(41), but somewhat higher than  
470 found by others using non-SMALP methods(39,40,43,44). We detected the sphingolipids IPC and  
471 MIPC and expected to also find M(IP)<sub>2</sub>C as major lipid species(41), but our M(IP)<sub>2</sub>C signal detection  
472 was poor in the overall (plasma) membrane. We therefore do not provide specific conclusions about  
473 the quantities of M(IP)<sub>2</sub>C in our SMALP samples. We find similar amounts of ergosterol in MCC and  
474 MCP by mass spectrometry analysis, whereas filipin staining in the literature has suggested that  
475 ergosterol is enriched in MCC/eisosomes(45). Here both the lipidomics data and filipin staining are  
476 consistent with one another(46), but not with prior observations(16,17).

477

478 We find that 30 mol% of ergosterol, corresponding to the overall concentration of this molecule in  
479 the plasma membrane, reduces the activity of Lyp1 (Fig. 7A). The observed 3-5 mol% of ergosterol in  
480 SMALP-Lyp1 is more in line with a high transport activity. Detailed analysis of the effects of lipids on  
481 the activity and regulation of membrane transport is limited to studies on bacterial transporters  
482 such as the lactose-proton symporter LacY(47), a leucine-proton symporter(48), the ATP-driven  
483 betaine transporter OpuA(49) and other membrane-associated proteins(50,51). Each of these  
484 systems requires anionic (PG) and non-bilayer (PE) lipids, and function optimally in lipids with  
485 dioleoyl chains. We find that Lyp1 performs poorly in dioleoyl-*sn*-phosphatidyl-based lipids and has  
486 an order of magnitude higher activity in palmitoyl-oleoyl-*sn*-phosphatidyl lipids.

487

488 Estimates of global membrane order, using fluorescence lifetime decay measurements and mutants  
489 defective in sphingolipid or ergosterol synthesis, suggest that the yeast plasma membrane harbors  
490 highly-ordered domains enriched in sphingolipids(10,52). This conclusion is consistent with the  
491 observation that the lateral diffusion of membrane proteins in the plasma membrane of yeast is 3-  
492 orders of magnitude slower than has been observed for membranes in the liquid-disordered  
493 state(8,13). Accordingly, the passive permeability of the yeast plasma membrane for weak acids is  
494 orders of magnitude lower than in bacteria(9). A membrane in the gel or highly liquid-ordered state  
495 may provide low leakiness that is needed for fungi to thrive in environments of low pH and/or high  
496 alcohol concentration, but it is not compatible with the dynamics of known membrane transporters,  
497 which undergo relatively large conformational changes when transiting from an outward- to inward-  
498 facing conformation. In fact, we are not aware of any transporter that is functional when it is  
499 embedded in a membrane in the liquid-ordered state.

500

501 The large, ordered lipid domains observed previously(10) might represent the MCP because Pma1 is  
502 enriched for sphingolipids relative to Sur7 in MCC. Furthermore, ergosterol is depleted from the  
503 periprotein lipidome of the Sur7, Can1, Lyp1 and Pma1 proteins and is 6-fold enriched in the  
504 surrounding bulk membranes. Sterols are known to increase the lipid order and interact more  
505 strongly with saturated than unsaturated lipids, therefore depletion of ergosterol from the  
506 periprotein lipidome is expected to decrease the lipid order. We propose that large parts of the  
507 yeast plasma membrane are in the liquid-ordered state but that individual proteins are surrounded  
508 by one or two layers of lipids with at least one unsaturated acyl chain to enable sufficient  
509 conformational dynamics of the proteins, which might be needed for transporters like  
510 Lyp1(35,53,54). The proteins in these membrane domains would diffuse slowly because they are  
511 embedded in an environment with a high lipid order.

512

## 513 Methods

514

### 515 *Yeast strains and plasmids*

516 *Saccharomyces cerevisiae* strains (Table S1) are derived from  $\Sigma$ 1278b (from Bruno Andre(55)) or  
517 BY4709; all strains are uracil auxotrophs (Ura3-negative). Plasmids are based on pFB001(31) and  
518 constructed by User Cloning™(New England Biolabs) in a three-way ligation method, where the  
519 plasmid is amplified in three similar sized fragments of which one contains the Gene Of Interest  
520 (GOI) and the other two form the full amp<sup>R</sup> gene when ligation is successful. Plasmid fragments were  
521 transformed and ligated in *Escherichia coli* MC1061 by means of the heat shock procedure. Plasmid  
522 assembly and nucleotide sequences were confirmed by DNA sequencing, and plasmids isolated from  
523 *E. coli* were transformed to *Saccharomyces cerevisiae* using the Li-acetate method(56) and selection  
524 was based on Ura3 complementation. Positive transformants were re-cultured twice to ensure  
525 clonality.

526

### 527 *Cultivation of S. cerevisiae and protein expression*

528 Chemicals were purchased from Sigma-Aldrich (DE), unless otherwise indicated. Cells were cultured  
529 at 30°C with 200 RPM shaking in 50 mL CELLreactor™ filter top tubes (*Greiner Bio-On*). Strains were  
530 grown overnight in 5 mL synthetic maltose media lacking uracil, lysine, arginine and histidine. Lack of  
531 uracil ensures the plasmid is retained, while lack of lysine, arginine and histidine ensures stable  
532 expression of Lyp1 and Can1 in the yeast PM. Media was prepared by dissolving (2% w/v maltose),  
533 0.69% yeast nitrogen base (YNB) without amino acids. Necessary amino acids were supplemented  
534 using 0.16% Kaiser synthetic mixture without uracil, lysine, arginine and histidine(57) *i.e. a mixture*  
535 *containing specific amino acids except uracil, lysine, arginine and histidine* (Formedium, UK). After  
536 growth overnight, cultures were diluted to OD<sub>600</sub> = 0.15 in 50 mL of Synthetic Maltose media lacking  
537 ura, lys, arg and his and grown to OD<sub>600</sub> = 0.75-1.5 in a 250 mL Erlenmeyer flask. After ~ 8 h, cultures  
538 were diluted 50-fold into 1.6L synthetic maltose media lacking ura, lys, arg and his; after ~15 h, the  
539 OD<sub>600</sub> reached 1.0-2.0, after which 1% w/v galactose was added to induce protein expression for 2,  
540 2.5 and 3 hours for Can1, Lyp1 and Pma1, respectively. To validate protein expression, we co-  
541 expressed the fusion constructs YPet-POI and mCherry-Pil1 and used confocal laser scanning  
542 microscopy (*Zeiss LSM710*); mCherry-Pil1 is a reporter of MCC/eisosomes. The excitation lasers for  
543 Ypet and mCherry were set at 488 and 543nm with emission filter settings between 509-538nm and  
544 550-700nm, respectively; the pinhole was set to 1 $\mu$ m. Images were processed using ImageJ to adjust  
545 contrast and brightness levels. (Original files are accessible in the supplementary data.) The  
546 expression of Lyp1 in *Pichia pastoris* and its membrane isolation was described previously(31).

547

### 548 *Plasma membrane isolation*

549 *P. pastoris* and *S. cerevisiae* cultures were harvested by centrifugation at 7,500 x g, for 15 min at 4°C  
550 (Beckman centrifuge J-20-XP, Rotor JLA 9.1000, US). Further steps were performed at 4°C or on ice.  
551 The resulting cell pellet was resuspended in 150 mL of cell resuspension buffer (CRB; 20mM Tris-HCl

552 pH6.7, 1mM EGTA, 0.6M sorbitol, 10 $\mu$ M pepstatin A (Apollo Scientific, UK), 10 $\mu$ M E-64 (Apollo  
553 Scientific, UK) plus protease inhibitors (cComplete Mini EDTA-free™, ROCHE, 1 tablet/75 mL).  
554 Centrifugation was repeated and the resulting cell pellet was resuspended to OD<sub>600</sub> = 200 in CRB  
555 with 1 tablet cComplete Mini EDTA-free™/10 mL). The resulting cell suspension was broken using a  
556 cell disrupter (Constant cell disruption systems, US) by three sequential passes operating at 39Kpsi,  
557 after which 2 mM fresh PMSF was added. Unbroken cells were pelleted by centrifugation at 18,000  
558 RCF for 30 min at 4°C (Beckman centrifuge J-20-XP, Rotor JA16.250, DE). The supernatant was  
559 transferred to 45 TI rotor (Beckman, DE) tubes and membranes were pelleted by ultracentrifugation  
560 (Optima XE-90, Beckman, DE) at 186,000 RCF, 90 min at 4°C. The resulting membrane pellet was  
561 resuspended to homogeneity at 400 mg/mL using a potter Elvehjem tissue grinder in 20 mM Tris-HCl  
562 pH7.5, 0.3M Sucrose, 10 $\mu$ M Pepstatin A, 10 $\mu$ M E-64 (Apollo Scientific, UK), 2 mM PMSF and  
563 protease inhibitor cocktail (cComplete Mini EDTA-free™, 1 tablet/10 mL). Aliquots of 2 mL were snap  
564 frozen using liquid nitrogen and stored at -80°C until further use.

565

#### 566 *SMA preparation*

567 Styrene Maleic Acid anhydride polymer (Xiran-SZ30010, Polyscope, NL) was hydrolyzed as  
568 described(58) and freeze-dried in aliquots of 2 grams. Upon use, SMA polymer was dissolved using  
569 50 mM Tris-HCl pH7.5 at 0.1 g/mL.

570

#### 571 *SMALP formation and protein purification*

572 Styrene Maleic Acid Lipid Particles (SMALPs) were formed by combining *S. cerevisiae* membranes  
573 with SMA polymer at a ratio of 1:3 w/w and left for 16 hours at 30°C. Unextracted material was  
574 removed by ultracentrifugation at 186,000 x g 60 min at 4°C. Further steps were performed at 4°C or  
575 on ice. The supernatant was mixed with 1 mL Ni-Sepharose resin (GE healthcare, US) and incubated  
576 for 24 hours under gentle nutation, and then poured into an empty column. The Ni-Sepharose was  
577 washed with 10mL Tris-HCl pH7.5, and SMALPs were eluted in 3 sequential steps using 1mL 50 mM  
578 Tris-HCl, 50 mM Imidazole pH7.5 with 10 minutes incubation between each elution. All elution  
579 fractions were pooled and concentrated to 500  $\mu$ L, using a 100 kDa spin concentrator (Merck, DE).  
580 Next, the sample was applied onto a size-exclusion chromatography column (Superdex 200 increase  
581 10/300GL, GE Healthcare, US) attached to an HPLC (Åkta, Amersham bioscience, SE) with in-line  
582 fluorescence detector (1260 Infinity, Agilent technologies, US) (FSEC) set to excitation and emission  
583 wavelengths of 517 and 530 nm, respectively, with bandwidths of 20 nm. 500  $\mu$ L Fractions were  
584 collected and concentrated to 20-40  $\mu$ L. The SMALP concentration was determined from absorbance  
585 measurements at 517 nm using a nanodrop (ND-1000, Isogen lifescience, NL) and an extinction  
586 coefficient for YPet of 26.810 M\*cm<sup>-1</sup>. Samples were flash frozen in liquid nitrogen and stored at -  
587 80°C until further use.

588

#### 589 *Lipid standards*

590 Diacylglycerol (DAG, #800515) was purchased from Sigma-Aldrich. Phosphatidylcholine (PC 34:1,  
591 #850475), phosphatidylinositol (PI 34:1, #850142), phosphatidylserine (PS 34:1, #840032),  
592 phosphatidylethanolamine (PE 34:1, #850757), phosphatidylglycerol (PG 36:1, #840503),  
593 phosphatidic acid (PA 34:1, #840857), cardiolipin (CL 72:4, #710335) were purchased from Avanti  
594 polar lipids.

595

#### 596 *Lipid extraction and mass spectrometry*

597 Lipid extraction from the SMALPs and the crude membranes was performed based on the Bligh and  
598 Dyer method(25). The lower organic phase was separated from the upper aqueous phase and dried  
599 under a nitrogen stream. The extracted lipid residue was re-dissolved in the starting mobile phase A  
600 and the injection volume was 10  $\mu$ l for each HPLC-MS run. The injection concentration for lipid  
601 extracts from SMALPs was normalized to 1  $\mu$ M based on input protein concentration. The injection  
602 amount for SMA polymer control was 0.02  $\mu$ g. The injection amounts for the crude membranes were

603 0.05, 0.25, 1, 2.5, or 10  $\mu\text{g}$  depending on the application. The samples were run on an Agilent  
604 Poroshell 120 A, EC-C18, 3 x 50 mm, 1.9  $\mu\text{m}$  reversed phase column equipped with an Agilent EC-  
605 C18, 3 x 5 mm, 2.7  $\mu\text{m}$  guard column and analyzed using Agilent 6530 Accurate-Mass Q-ToF/ 1260  
606 series HPLC instrument. The mobile phases were (A) 2 mM ammonium-formate in methanol /water  
607 (95/5; V/V) and (B) 3 mM ammonium formate in 1-propanol/cyclohexane/water (90/10/0.1; v/v/v).  
608 In a 20-minute run, the solvent gradient changes as follows: 0-4 min, 100% A; 4-10 min, from 100% A  
609 to 100% B; 10-15 min, 100%B; 15-16 min, from 100% B to 100% A; 16-20 min, 100% A. For the  
610 lipidomic analysis, three independently purified SMALP-Pma1 (MCP) or SMALP-Sur7 (MCC)  
611 complexes were analyzed and compared to the SMA polymers alone. Data were analyzed using Mass  
612 Hunter (Agilent) and R package XCMS(59) for lipidomic peak analyses and *in house* designed  
613 software methods(26).

614  
615 For the mass spectrometry belonging to figure S4: 10ul of the lipid extraction was injected on a  
616 hydrophilic interaction liquid chromatography (HILIC) column (2.6  $\mu\text{m}$  HILIC 100  $\text{\AA}$ , 50 x 4.6 mm,  
617 Phenomenex, Torrance, CA). The mobile phases were (A) acetonitrile/acetone (9:1, v/v), 0.1% formic  
618 acid and (B) acetonitrile/H<sub>2</sub>O (7:3, v/v), 10mM ammonium formate, 0.1% formic acid. In a 6.5-  
619 minute run, the solvent gradient changes as follows: 0-1 min, from 100% A to 50% A and B; 1-3 min,  
620 stay 50% B; 3-3.1 min, 100% B; 3.1-4 min, stay 100% B; 4-6.5 min from 100% B to 100% A. Flowrate  
621 was 1.0mL/min The column outlet of the LC system (Accela/Surveyor; Thermo) was connected to a  
622 heated electrospray ionization (HESI) source of mass spectrometer (LTQ Orbitrap XL; Thermo)  
623 operated in negative mode. Capillary temperature was set to 350°C, and the ionization voltage to 4.0  
624 kV. High resolution spectra were collected with the Orbitrap from m/z 350-1750 at resolution 60,000  
625 (1.15 scans/second). After conversion to mzXML data were analyzed using XCMS version 3.6.1  
626 running under R version 3.6.1.

627  
628 To estimate the lipid quantity, the lipid concentration was obtained by external standard curve  
629 fitting. Briefly, a series of concentrations of synthetic standard were prepared and analyzed by HPLC-  
630 MS to determine the response factor and degree of linearity of input lipid to count values. The ion  
631 chromatogram peak areas from known concentrations were used to generate the standard curves  
632 for determining the unknown concentrations of the extracted lipids. For key applications where the  
633 highest quality lipid quantification was needed or when input lipid mixtures were complex, we used  
634 internal standards for authentic lipids and the method of standard addition. For phospholipids, 0.25  
635  $\mu\text{g}$  crude membrane samples were spiked with a series of known concentrations (0, 0.5, 1.0, 1.5, and  
636 2.0 pmol/ $\mu\text{l}$ ) of synthetic molecules for C34:1 PC, C34:1 PE, C34:1 PS, or C34:1 PI and subjected to  
637 HPLC-MS negative ion mode analysis. For ergosterol, 0.05  $\mu\text{g}$  crude membrane samples were spiked  
638 with a series of known concentrations of the synthetic standard (0, 1 pmol/ $\mu\text{l}$ , 3 pmol/ $\mu\text{l}$ , and 5  
639 pmol/ $\mu\text{l}$ ), and the data were acquired in the positive ion mode. The ion chromatogram peak areas of  
640 the specific m/z values were plotted against the concentrations of the spiked synthetic standards to  
641 extrapolate concentration of natural lipids on the X-axis.

#### 642 643 *Liposome formation*

644 Phospholipids were obtained from (Avanti polar lipids Inc, Alabaster, AL, USA), and brassicasterol  
645 (CarboSynth, UK), 7-dehydrocholesterol (Sigma Aldrich, DE), cholesterol and ergosterol (Sigma  
646 Aldrich, DE) were obtained from the indicated vendor. Lipids were dissolved in chloroform and  
647 mixed at desired ratios (mol%) to a total weight of 10 mg in a 5 mL glass round bottom flask.  
648 Chloroform was removed by evaporation at 40°C and an applied pressure (*p*) of 370 mBar, using a  
649 rotary vaporizer (rotavapor r-3-BUCHI). The resulting lipid film was resuspended in 1 mL of  
650 diethylether and the previous step was repeated at atmospheric pressure until a dry film was visible.  
651 To remove any residual solvent a pressure of 10 mBar was applied for 20 minutes. The obtained lipid  
652 film was hydrated in 1mL of 50 mM NH<sub>4</sub>Acetate pH7.5, 50 mM NaCl by shaking for 5 min and then  
653 transferred to a plastic tube compatible with sonication. The lipid suspension was homogenized by

654 tip sonication with a Sonics Vibra Cell sonicator (Sonics & Materials Inc.) at amplitude of 70% for 2  
655 minutes with 5 sec pulses and 5 sec pauses between each pulse. The sample was kept at 4°C in  
656 ethanol:water:ice (25:25:50 v/v/v). The lipid suspension (1 mL aliquot at 10 mg of lipid/mL) was  
657 transferred to a 1.5 mL Eppendorf tube, snap frozen in liquid nitrogen and thawed at 40 °C. This  
658 process was repeated 4 times and stored in liquid nitrogen until further use.

659

#### 660 *Proteoliposome preparation*

661 Protein purification and membrane reconstitution was performed as described(31). Briefly, *n*-  
662 Dodecylmaltoside (DDM) was used to solubilize Lyp1-GFP. The protein was purified by Immobilized  
663 Metal Affinity Chromatography (IMAC, using Nickel-Sepharose) and Fluorescence Size-Exclusion  
664 Chromatography (FSEC, using a Superdex 200 increase 300/10 GL column attached to an Åkta 900  
665 chromatography system (Amersham Bioscience, SE) with in-line Fluorescence detector (1260  
666 Infinity, Agilent technologies, US). In parallel, liposomes were thawed at room temperature and  
667 subsequently homogenized by 11 extrusions through a 400nm polycarbonate filter (Avestin Europe  
668 GMBH, Ger). Next, liposomes were destabilized using Triton X-100 and titrated to a point beyond the  
669 saturation point (Rsat) as described(60); the final turbidity at 540 nm was at approximately 60% of  
670 Rsat. Purified Lyp1 was mixed with triton x-100-destabilized liposomes of the appropriate lipid  
671 composition at a protein-to-lipid ratio of 1:400 and incubated for 15 min under slow agitation at 4°C.  
672 Bio-beads SM-200 (Biorad, Hercules, Ca, USA), 100 mg/0.4% Triton X-100 (final concentration of  
673 Triton x-100 after solubilization of the liposomes) were sequentially added at 15, 30 and 60 min. The  
674 final mixture was incubated overnight, after which a final batch of bio-beads was added and  
675 incubation continued for another 2 hours. Protein containing liposomes (proteo-liposomes) were  
676 separated from the Bio-beads by filtration on a column followed by ultracentrifugation 444,000 x g  
677 at 4°C for 35 min. Proteo-liposomes were suspended in 10 mM potassium-phosphate plus 100 mM  
678 potassium-acetate pH 6.0, snap frozen and stored in liquid nitrogen.

679

#### 680 *In vitro transport assays*

681 Transport assays were performed and the formation of a proton gradient ( $\Delta\text{pH}$ ) and membrane  
682 potential ( $\Delta\Psi$ ) was established as described in(31). Both  $\Delta\text{pH}$  and  $\Delta\Psi$  were formed by diluting the  
683 proteo-liposomes (suspended in 10 mM potassium-phosphate plus 100 mM potassium-acetate pH  
684 6.0) 25-fold into 110 mM sodium-phosphate pH6.0 plus 0.5  $\mu\text{M}$  valinomycin. This results in maximal  
685 values of  $Z\Delta\text{pH}$  and  $\Delta\Psi$  of -83 mV as calculated according to the Nernst equation, yielding a proton  
686 motive force of -166 mV.

687

#### 688 *Data analysis and transport rates*

689 The data were analyzed in Origin (OriginLab, MA). The initial rates of transport were determined  
690 from the slope of progress curves (e.g. Supplementary Figure S11B). The relative transport activity  
691 was determined by normalizing each vesicle preparation to the sample with a lipid composition  
692 POPC:POPE:POPS:POPG:Ergosterol in a ratio of 17.5:17.5:17.5:17.5:30 (mol%).

693

#### 694 *Protein surface area calculations*

695 Membrane-oriented protein structures were obtained from the OPM database(36), the OPM  
696 database positions proteins in a lipid bilayer by minimizing its transfer energy from water to  
697 membrane; LeuT inward-open (PDB ID: 3f3a), LeuT outward-open (PDB ID: 5jag). Protein area in the  
698 plane of the outer and inner leaflet determined by the OPM database were calculated by numerical  
699 integration as follows: equation:  $\sum_{A=0}^n = r^2 \cdot \tan(\frac{1}{2}\theta)$ . For this a polar coordinate system from  
700 the center of the protein was established (n=80) resulting in an angle ( $\theta$ ) of 4.5° between each  
701 coordinate. The distance (r) was determined from the most distant atom between two polar  
702 coordinates. This distance was applied at  $\frac{1}{2}\theta$ . From distance r on  $\frac{1}{2}\theta$ , a perpendicular line was  
703 drawn (b) resulting in a right-angled triangle for which the surface area can be calculated using the



704 tangent,  $\frac{1}{2} \theta$  and  $r$ . The area was calculated for each of the 80 polar coordinates and summated to  
705 acquire the total surface area of the protein.

706

## 707 References

708

- 709 1. Physical Basis of Self-Organization and Function of Membranes: Physics of Vesicles. *Handb*  
710 *Biol Phys* [Internet]. 1995 Jan 1 [cited 2019 Sep 10];1:213–304. Available from:  
711 <https://www.sciencedirect.com/science/article/abs/pii/S1383812106800229?via%3Dihub>
- 712 2. de la Serna J, Schütz GJ, Eggeling C, Cebebauer M. There Is No Simple Model of the Plasma  
713 Membrane Organization. *Front Cell Dev Biol*. 2016;4:106.
- 714 3. Cerbon J, Calderon V. Generation modulation and maintenance of the plasma membrane  
715 asymmetric phospholipid composition in yeast cells during growth: their relation to surface  
716 potential and membrane protein activity. *Biochim Biophys Acta - Biomembr* [Internet]. 1995  
717 Apr 12 [cited 2019 Oct 4];1235(1):100–6. Available from:  
718 <https://www.sciencedirect.com/science/article/pii/000527369400311C?via%3Dihub>
- 719 4. Solanko LM, Sullivan DP, Sere YY, Szomek M, Lunding A, Solanko KA, et al. Ergosterol is mainly  
720 located in the cytoplasmic leaflet of the yeast plasma membrane. *Traffic* [Internet]. 2018 Mar  
721 [cited 2019 Aug 19];19(3):198–214. Available from:  
722 <http://www.ncbi.nlm.nih.gov/pubmed/29282820>
- 723 5. Distribution and functions of sterols and sphingolipids. *Cold Spring Harb Perspect Biol*.  
724 2011;3(5):a004762.
- 725 6. Heard GM, Fleet GH. The effects of temperature and pH on the growth of yeast species  
726 during the fermentation of grape juice. *J Appl Bacteriol*. 1988;65(1):23–8.
- 727 7. Gray WD. Studies on the Alcohol Tolerance of Yeasts. *J Bacteriol* [Internet]. 1941 Nov [cited  
728 2019 Oct 22];42(5):561–74. Available from: <http://www.ncbi.nlm.nih.gov/pubmed/16560468>
- 729 8. Bianchi F, Syga Ł, Moiset G, Spakman D, Schavemaker PE, Punter CM, et al. Steric exclusion  
730 and protein conformation determine the localization of plasma membrane transporters. *Nat*  
731 *Commun*. 2018;9(1):501.
- 732 9. Gabba M, Frallicciardi J, van't Klooster J, Henderson R, Syga Ł, Mans R, et al. Weak Acid  
733 Permeation in Synthetic Lipid Vesicles and Across the Yeast Plasma Membrane. *Biophys J*  
734 [Internet]. 2019 Nov [cited 2019 Dec 4]; Available from:  
735 <https://linkinghub.elsevier.com/retrieve/pii/S0006349519343413>
- 736 10. Aresta-Branco F, Cordeiro AM, Marinho SH, Cyrne L, Antunes F, de Almeida RFM. Gel  
737 Domains in the Plasma Membrane of *Saccharomyces cerevisiae* HIGHLY ORDERED,  
738 ERGOSTEROL-FREE, AND SPHINGOLIPID-ENRICHED LIPID RAFTS. 2011;286(7):5043–54.
- 739 11. Malínská K, Malínský J, Opekarová M, Tanner W. Visualization of Protein Compartmentation  
740 within the Plasma Membrane of Living Yeast Cells. *Mol Biol Cell*. 2003;14(11):4427–36.
- 741 12. Malinska K, Malinsky J, Opekarova M, Tanner W. Distribution of Can1p into stable domains  
742 reflects lateral protein segregation within the plasma membrane of living *S. cerevisiae* cells. *J*  
743 *Cell Sci*. 2004;117(25):6031–41.
- 744 13. Gournas C, Gkionis S, Carquin M, Twyffels L, Tyteca D, André B. Conformation-dependent  
745 partitioning of yeast nutrient transporters into starvation-protective membrane domains.  
746 *Proc Natl Acad Sci*. 2018;115(14):201719462.
- 747 14. Spira F, Mueller NS, Beck G, von Olshausen P, Beig J, Wedlich-Söldner R. Patchwork  
748 organization of the yeast plasma membrane into numerous coexisting domains. *Nat Cell Biol*  
749 [Internet]. 2012;14(6):640. Available from: <https://www.nature.com/articles/ncb2487>
- 750 15. Walther TC, Brickner JH, Aguilar PS, Bernales S, Pantoja C, Walter P. Eisosomes mark static  
751 sites of endocytosis. *Nature*. 2006;439(7079):998.
- 752 16. Grossmann G, Opekarová M, Malinsky J, Weig-Meckl I, Tanner W. Membrane potential  
753 governs lateral segregation of plasma membrane proteins and lipids in yeast. *Embo J*.  
754 2007;26(1):1–8.



- 755 17. Grossmann G, Malinsky J, Stahlschmidt W, Loibl M, Weig-Meckl I, Frommer WB, et al. Plasma  
756 membrane microdomains regulate turnover of transport proteins in yeast. *J Cell Biol.*  
757 2008;183(6):1075–88.
- 758 18. Dörr JM, Scheidelaar S, Koorengel MC, Dominguez JJ, Schäfer M, van Walree CA, et al. The  
759 styrene–maleic acid copolymer: a versatile tool in membrane research. *Eur Biophys J*  
760 [Internet]. 2016 Jan 6;45(1):3–21. Available from: [http://link.springer.com/10.1007/s00249-](http://link.springer.com/10.1007/s00249-015-1093-y)  
761 015-1093-y
- 762 19. Knowles TJ, Finka R, Smith C, Lin Y-P, Dafforn T, Overduin M. Membrane Proteins Solubilized  
763 Intact in Lipid Containing Nanoparticles Bounded by Styrene Maleic Acid Copolymer. *J Am*  
764 *Chem Soc* [Internet]. 2009 Jun 10 [cited 2019 Oct 9];131(22):7484–5. Available from:  
765 <https://pubs.acs.org/doi/10.1021/ja810046q>
- 766 20. Itzhak DN, Tyanova S, Cox J, Borner GHH. Global, quantitative and dynamic mapping of  
767 protein subcellular localization. *Elife.* 2016 Jun 9;5(JUN2016).
- 768 21. Ghaddar K, Merhi A, Saliba E, Krammer E-M, Prévost M, André B. Substrate-Induced  
769 Ubiquitylation and Endocytosis of Yeast Amino Acid Permeases. *Mol Cell Biol.*  
770 2014;34(24):4447–63.
- 771 22. Rothbauer U, Zolghadr K, Muyldermans S, Schepers A, Cardoso MC, Leonhardt H. A versatile  
772 nanotrapp for biochemical and functional studies with fluorescent fusion proteins. *Mol Cell*  
773 *Proteomics.* 2008;7(2):282–9.
- 774 23. Pardo JJ, Dörr JM, Iyer A, Cox RC, Scheidelaar S, Koorengel MC, et al. Solubilization of lipids  
775 and lipid phases by the styrene–maleic acid copolymer. *Eur Biophys J.* 2016;46(1):1–11.
- 776 24. Scheidelaar S, Koorengel MC, Pardo J, Meeldijk JD, Breukink E, Killian AJ. Molecular model  
777 for the solubilization of membranes into nanodisks by styrene maleic Acid copolymers.  
778 *Biophys J.* 2015;108(2):279–90.
- 779 25. BLIGH EG, DYER WJ. A rapid method of total lipid extraction and purification. *Can J Biochem*  
780 *Physiol.* 1959;37(8):911–7.
- 781 26. Layre E, Sweet L, Hong S, Madigan CA, Desjardins D, Young DC, et al. A comparative  
782 lipidomics platform for chemotaxonomic analysis of mycobacterium tuberculosis. *Chem Biol.*  
783 2011 Dec 23;18(12):1537–49.
- 784 27. Drage MG, Tsai HC, Pecora ND, Cheng TY, Arida AR, Shukla S, et al. Mycobacterium  
785 tuberculosis lipoprotein LprG (Rv1411c) binds triacylated glycolipid agonists of Toll-like  
786 receptor 2. *Nat Struct Mol Biol.* 2010 Sep;17(9):1088–95.
- 787 28. Huang S, Cheng T-Y, Young DC, Layre E, Madigan CA, Shires J, et al. Discovery of  
788 deoxyceramides and diacylglycerols as CD1b scaffold lipids among diverse groove-blocking  
789 lipids of the human CD1 system. *Proc Natl Acad Sci* [Internet]. 2011 Nov 29 [cited 2019 Sep  
790 10];108(48):19335–40. Available from: <http://www.ncbi.nlm.nih.gov/pubmed/22087000>
- 791 29. Birkinshaw RW, Pellicci DG, Cheng T-Y, Keller AN, Sandoval-Romero M, Gras S, et al.  $\alpha\beta$  T cell  
792 antigen receptor recognition of CD1a presenting self lipid ligands. *Nat Immunol* [Internet].  
793 2015 Mar 2 [cited 2019 Sep 10];16(3):258–66. Available from:  
794 <http://www.nature.com/articles/ni.3098>
- 795 30. Wun KS, Reijneveld JF, Cheng T-Y, Ladell K, Uldrich AP, Le Nours J, et al. T cell autoreactivity  
796 directed toward CD1c itself rather than toward carried self lipids. *Nat Immunol* [Internet].  
797 2018 Apr 12 [cited 2019 Sep 10];19(4):397–406. Available from:  
798 <http://www.ncbi.nlm.nih.gov/pubmed/29531339>
- 799 31. Bianchi F, van Klooster JS, Ruiz SJ, Luck K, Pols T, Urbatsch IL, et al. Asymmetry in inward- and  
800 outward-affinity constant of transport explain unidirectional lysine flux in *Saccharomyces*  
801 *cerevisiae*. *Sci Rep-uk.* 2016;6(1):31443.
- 802 32. Van Den Brink-Van Der Laan E, Antoinette Killian J, De Kruijff B. Nonbilayer lipids affect  
803 peripheral and integral membrane proteins via changes in the lateral pressure profile. Vol.  
804 1666, *Biochimica et Biophysica Acta - Biomembranes.* 2004. p. 275–88.
- 805 33. van der Rest ME, Kamminga a H, Nakano a, Anraku Y, Poolman B, Konings WN. The plasma

- 806 membrane of *Saccharomyces cerevisiae*: structure, function, and biogenesis. *Microbiol Rev.*  
807 1995;59(2):304–22.
- 808 34. Greenberg ML, Axelrod D. Anomalous slow mobility of fluorescent lipid probes in the  
809 plasma membrane of the yeast *Saccharomyces cerevisiae*. *J Membr Biol.* 1993  
810 Jan;131(2):115–27.
- 811 35. Krishnamurthy H, Gouaux E. X-ray structures of LeuT in substrate-free outward-open and apo  
812 inward-open states. *Nature.* 2012;481(7382):469.
- 813 36. Lomize MA, Pogozheva ID, Joo H, Mosberg HI, Lomize AL. OPM database and PPM web  
814 server: Resources for positioning of proteins in membranes. *Nucleic Acids Res.* 2012  
815 Jan;40(D1).
- 816 37. Duschl C, Boncheva M, Vogel H. A miniaturized monolayer trough with variable surface area  
817 in the square-millimeter range. *Biochim Biophys Acta - Biomembr [Internet].* 1998 May [cited  
818 2019 Nov 18];1371(2):345–50. Available from:  
819 <https://linkinghub.elsevier.com/retrieve/pii/S0005273698000364>
- 820 38. Monje-Galvan V, Klauda JB. Modeling Yeast Organelle Membranes and How Lipid Diversity  
821 Influences Bilayer Properties. *Biochemistry [Internet].* 2015 Nov 17 [cited 2019 Oct  
822 16];54(45):6852–61. Available from: <http://www.ncbi.nlm.nih.gov/pubmed/26497753>
- 823 39. Zinser E, Sperka-Gottlieb CD, Fasch E V, Kohlwein SD, Paltauf F, Daum G. Phospholipid  
824 synthesis and lipid composition of subcellular membranes in the unicellular eukaryote  
825 *Saccharomyces cerevisiae*. 1991;173(6):2026–34.
- 826 40. Zinser E, Daum G. Isolation and biochemical characterization of organelles from the yeast,  
827 *Saccharomyces cerevisiae*. *Yeast.* 1995;11(6):493–536.
- 828 41. Ejsing CS, Sampaio JL, Surendranath V, Duchoslav E, Ekroos K, Klemm RW, et al. Global  
829 analysis of the yeast lipidome by quantitative shotgun mass spectrometry. *Proc Natl Acad Sci*  
830 *USA.* 2009;106(7):2136–41.
- 831 42. Tuller G, Nemeč T, Hrastnik C, Daum G. Lipid composition of subcellular membranes of an  
832 FY1679-derived haploid yeast wild-type strain grown on different carbon sources. *Yeast.*  
833 1999;15(14):1555–64.
- 834 43. Schneider R, Brügger B, Sandhoff R, Zellnig G, Leber A, Lampl M, et al. Electrospray ionization  
835 tandem mass spectrometry (ESI-MS/MS) analysis of the lipid molecular species composition  
836 of yeast subcellular membranes reveals acyl chain-based sorting/remodeling of distinct  
837 molecular species en route to the plasma membrane. *J Cell Biol.* 1999;146(4):741–54.
- 838 44. Daum G, Tuller G, Nemeč T, Hrastnik C, Balliano G, Cattel L, et al. Systematic analysis of yeast  
839 strains with possible defects in lipid metabolism. *Yeast.* 1999;15(7):601–14.
- 840 45. Moreira KE, Schuck S, Schrul B, Fröhlich F, Moseley JB, Walther TC, et al. Seg1 controls  
841 eisosome assembly and shape. *J Cell Biol.* 2012;198(3):405–20.
- 842 46. Kraft ML. Sphingolipid Organization in the Plasma Membrane and the Mechanisms That  
843 Influence It. 2017;4:154.
- 844 47. Bogdanov M, Sun J, Kaback HR, Dowhan W. A Phospholipid Acts as a Chaperone in Assembly  
845 of a Membrane Transport Protein. *J Biol Chem [Internet].* 1996 May 17;271(20):11615–8.  
846 Available from: <http://www.jbc.org/lookup/doi/10.1074/jbc.271.20.11615>
- 847 48. Veld GI, Driessen AJM, Op den Kamp JAF, Konings WN. Hydrophobic membrane thickness and  
848 lipid-protein interactions of the leucine transport system of *Lactococcus lactis*. *Biochim*  
849 *Biophys Acta - Biomembr [Internet].* 1991 Jun 18 [cited 2019 Oct 8];1065(2):203–12.  
850 Available from:  
851 <https://www.sciencedirect.com/science/article/pii/000527369190231V?via%3Dihub>
- 852 49. Karasawa A, Swier LJYM, Stuart MCA, Brouwers J, Helms B, Poolman B. Physicochemical  
853 factors controlling the activity and energy coupling of an ionic strength-gated ATP-binding  
854 cassette (ABC) transporter. *J Biol Chem.* 2013;288(41):29862–71.
- 855 50. Teo ACK, Lee SC, Pollock NL, Stroud Z, Hall S, Thakker A, et al. Analysis of SMALP co-extracted  
856 phospholipids shows distinct membrane environments for three classes of bacterial

- 857 membrane protein. *Sci Rep.* 2019;9(1):1813.
- 858 51. Laganowsky A, Reading E, Allison TM, Ulmschneider MB, Degiacomi MT, Baldwin AJ, et al.  
859 Membrane proteins bind lipids selectively to modulate their structure and function. *Nature.*  
860 2014;510(7503):172–5.
- 861 52. Arora A, Raghuraman H, Chattopadhyay A. Influence of cholesterol and ergosterol on  
862 membrane dynamics: a fluorescence approach. *Biochem Biophys Res Commun.*  
863 2004;318(4):920–6.
- 864 53. Kowalczyk L, Ratera M, Paladino A, Bartoccioni P, Errasti-Murugarren E, Valencia E, et al.  
865 Molecular basis of substrate-induced permeation by an amino acid antiporter. *Proc Natl Acad*  
866 *Sci.* 2011;108(10):3935–40.
- 867 54. Ghaddar K, Krammer EM, Mihajlovic N, Brohée S, André B, Prévost M. Converting the yeast  
868 arginine Can1 permease to a lysine permease. *J Biol Chem.* 2014;289(10):7232–46.
- 869 55. Gournas C, Saliba E, Krammer E-M, Barthelemy C, Prévost M, André B. Transition of yeast  
870 Can1 transporter to the inward-facing state unveils an  $\alpha$ -arrestin target sequence promoting  
871 its ubiquitylation and endocytosis. *Mol Biol Cell.* 2017;28:2819–32.
- 872 56. Schiestl RH, Gietz RD. High efficiency transformation of intact yeast cells using single stranded  
873 nucleic acids as a carrier. *Curr Genet.* 1989;
- 874 57. Kaiser C, Michaelis S, Mitchell A, Cold Spring Harbor Laboratory. *Methods in yeast genetics : a*  
875 *Cold Spring Harbor Laboratory course manual [Internet]. Cold Spring Harbor Laboratory*  
876 *Press; 1994 [cited 2019 Oct 4]. 234 p. Available from:*  
877 [https://books.google.nl/books/about/Methods\\_in\\_yeast\\_genetics.html?id=u4MMAQAAMAA](https://books.google.nl/books/about/Methods_in_yeast_genetics.html?id=u4MMAQAAMAAJ&redir_esc=y)  
878 [J&redir\\_esc=y](https://books.google.nl/books/about/Methods_in_yeast_genetics.html?id=u4MMAQAAMAAJ&redir_esc=y)
- 879 58. Lee SC, Knowles TJ, Postis VLG, Jamshad M, Parslow RA, Lin Y-P, et al. A method for  
880 detergent-free isolation of membrane proteins in their local lipid environment. *Nat Protoc.*  
881 2016;11(7):1149–62.
- 882 59. Smith CA, Want EJ, O’Maille G, Abagyan R, Siuzdak G. XCMS: Processing mass spectrometry  
883 data for metabolite profiling using nonlinear peak alignment, matching, and identification.  
884 *Anal Chem.* 2006 Feb 1;78(3):779–87.
- 885 60. Geertsma ER, Nik Mahmood N a B, Schuurman-Wolters GK, Poolman B. Membrane  
886 reconstitution of ABC transporters and assays of translocator function. *Nat Protoc.*  
887 2008;3(2):256–66.

888  
889

### 890 **Acknowledgements**

891 This work was carried out within the BE-Basic R&D Program, which was granted a FES subsidy from  
892 the Dutch Ministry of Economic affairs, agriculture and innovation (EL&I), and was supported by an  
893 ERC Advanced Grant (ABCVolume; #670578) and by NIH grants (AI116604 and AR048632). The  
894 research was also funded by NWO TOP-PUNT (project number 13.006) grants. We thank Dr. prof.  
895 Bruno André for sharing the 23344C and SG067 strains.

896  
897

### 898 **Author contributions**

899 J.S.v.t.K., D.B.M. and B.P. designed the research plan; J.S.v.t.K performed the research except for the  
900 liquid-chromatography coupled to mass spectrometry analysis; T-Y.C performed the LC-MS analysis;  
901 J.S.v.t.K., T-Y.C., D.B.M. and B.P. analyzed the data; H.R.Sikkema performed the *in silico* analysis of  
902 protein surface calculations; A. Jeucken performed mass spectrometry analysis corresponding to  
903 figure S4; J.S.v.t.K., T-Y.C., D.B.M. and B.P. wrote the paper.

904  
905

### 906 **Source data**

907 Source data is uploaded separately as excel files:

908 Lipidomics SMALP Can1-MCC  
909 Lipidomics SMALP Can1-MCP  
910 Lipidomics SMALP Lyp1-MCC  
911 Lipidomics SMALP Lyp1-MCP  
912 Lipidomics SMALP Pma1-MCP  
913 Lipidomics SMALP Sur7-MCC  
914 Lipidomics Y5000  
915 Lipidomics Y8000  
916  
917  
918  
919  
920  
921  
922

## SUPPLEMENTARY INFORMATION

### Periprotein membrane lipidomics and the role of lipids in transporter function in yeast

Joury S van 't Klooster<sup>a</sup>, Tan-Yun Cheng<sup>b</sup>, Hendrik R Sikkema<sup>a</sup>, Aike Jeucken<sup>a</sup>, D. Branch Moody<sup>b,c</sup> and Bert Poolman<sup>a,\*</sup>

<sup>a</sup>Department of Biochemistry, University of Groningen  
Groningen Biomolecular Sciences and Biotechnology Institute  
Nijenborgh 4, 9747 AG Groningen, The Netherlands

<sup>b</sup>Division of Rheumatology, Immunology and Allergy  
Brigham and Women's Hospital, Harvard Medical School  
60 Fenwood Road, Boston, MA, 02115, USA.

<sup>c</sup>Department of Medicine, Harvard Medical School, Boston, MA, 02115, USA.

\*To whom correspondence should be addressed

E-mail: [b.poolman@rug.nl](mailto:b.poolman@rug.nl) or [bmoody@bwh.harvard.edu](mailto:bmoody@bwh.harvard.edu)

Supplementary Table S1-S2

Supplementary Figures S1-S12

## Supplementary tables

Table S1: All strains and plasmids used in this study

| Strain/Name     | Genotype                                                                            | Ref / Origin             |
|-----------------|-------------------------------------------------------------------------------------|--------------------------|
| Y8001/Lyp1 MCP  | <i>ura3-Δ1</i> , pJK2001                                                            | ( <sup>13</sup> ) 23344C |
| Y8002/Can1 MCP  | <i>ura3-Δ1</i> , pJK2002                                                            | ( <sup>13</sup> ) 23344C |
| Y8003/Pma1 MCP  | <i>ura3-Δ1</i> , pJK2003                                                            | ( <sup>13</sup> ) 23344C |
| Y10001/Lyp1 MCC | Sur7p-GBP, Pil1-mCherry, <i>can1-Δ1</i> , <i>gap1-Δ1</i> , <i>ura3-Δ1</i> , pJK2001 | ( <sup>13</sup> ) SG067  |
| Y10002/Can1 MCC | Sur7p-GBP, Pil1-mCherry, <i>can1-Δ1</i> , <i>gap1-Δ1</i> , <i>ura3-Δ1</i> , pJK2002 | ( <sup>13</sup> ) SG067  |
| Y5007/Sur7      | <i>ura3-Δ1</i> , Sur7p-Ypet                                                         | This Study               |
| Plasmid         | Description                                                                         | origin                   |
| pJK2001         | CEN-ARS, pGal_Lyp1p-Ypet_RGShis10, <i>ura3</i>                                      | This study               |
| pJK2002         | CEN-ARS, pGal_Can1p-Ypet_RGShis10, <i>ura3</i>                                      | This study               |
| pJK2003         | CEN-ARS, pGal_Pma1p-Ypet_RGShis10, <i>ura3</i>                                      | This study               |



Table S2: lipids identified by targeted lipidomic analysis based on the ions identified from both SMALP-Pma1 and SMALP-Sur7. Other SMALPs: Lyp1-MCP, Lyp1-MCC, Can1-MCP, and Can1-MCC. Values are expressed as pmol lipid per 10 pmol protein. Chromatography peak areas used in our calculations are given for ergosterol and the sphingolipids IPC and MIPC.

| m/z/lipid chain | pmol lipid / 10 pmol protein |               |               |               |               |               |
|-----------------|------------------------------|---------------|---------------|---------------|---------------|---------------|
|                 | Pma1 MCP                     | Sur7 MCC      | Lyp1 MCP      | Lyp1 MCC      | Can1 MCP      | Can1 MCC      |
| <b>PC</b>       |                              |               |               |               |               |               |
| 692.4508/C26:1  | 3.03 ± 0.13                  | 0 ± 0         | 2,56 ± 0,49   | 2,45 ± 0,34   | 2.33 ± 0.37   | 1.42 ± 0.32   |
| 722.4977/C28:0  | 1.11 ± 0.13                  | 1.06 ± 0.24   | 1,01 ± 0,23   | 0,98 ± 0,2    | 0.98 ± 0.17   | 0.7 ± 0.09    |
| 720.4821/C28:1  | 9.93 ± 0.8                   | 2.23 ± 0.47   | 10,52 ± 2,61  | 8,57 ± 2,27   | 8.13 ± 1.47   | 6 ± 0.81      |
| 748.5134/C30:1  | 11.75 ± 1.13                 | 2.42 ± 0.5    | 9,19 ± 2,6    | 9,74 ± 2,43   | 10.48 ± 1.82  | 7.41 ± 1.11   |
| 746.4972/C30:2  | 13.38 ± 1.14                 | 1.71 ± 0.57   | 10,18 ± 2,08  | 11,01 ± 2,42  | 10.79 ± 1.71  | 8.07 ± 1.11   |
| 776.5447/C32:1  | 18.11 ± 0.69                 | 37.82 ± 10.28 | 24,89 ± 9,15  | 16,54 ± 3,04  | 18.09 ± 2.32  | 13.81 ± 1.41  |
| 774.529/C32:2   | 177.7 ± 17.5                 | 76.5 ± 19.7   | 160,6 ± 455   | 134,0 ± 32,6  | 159.9 ± 38.9  | 112.5 ± 26.4  |
| 804.576/C34:1   | 15.21 ± 1.45                 | 31.44 ± 7.41  | 13,52 ± 4,48  | 13,79 ± 4,38  | 12.76 ± 2.21  | 9.22 ± 2      |
| 802.5603/C34:2  | 101.06 ± 3.49                | 70.8 ± 17.72  | 99,03 ± 28,42 | 76,83 ± 10,1  | 92.97 ± 14.04 | 66.37 ± 14.55 |
| 832.6073/C36:1  | 1.98 ± 0.18                  | 5.68 ± 2      | 3 ± 1,17      | 1,63 ± 0,19   | 2.22 ± 0.79   | 1.35 ± 0.46   |
| 830.5916/C36:2  | 6.62 ± 1.27                  | 7.01 ± 2.29   | 11,88 ± 6,78  | 4,96 ± 1,68   | 6.15 ± 1.99   | 5.28 ± 2.26   |
| <b>PI</b>       |                              |               |               |               |               |               |
| 725.4246/C26:0  | 1.98 ± 0.28                  | 0.44 ± 0.14   | 1,65 ± 0,46   | 1,81 ± 0,46   | 1.97 ± 0.56   | 1.12 ± 0.28   |
| 753.4559/C28:0  | 5.92 ± 0.71                  | 1.47 ± 0.38   | 4,58 ± 1,13   | 4,57 ± 1,24   | 5.25 ± 1.32   | 3.31 ± 0.69   |
| 751.4403/C28:1  | 1.4 ± 0.15                   | 0 ± 0         | 0,8 ± 0,2     | 1,01 ± 0,24   | 0.97 ± 0.24   | 0.61 ± 0.16   |
| 779.4716/C30:1  | 7.48 ± 1.04                  | 0 ± 0         | 4,49 ± 1,02   | 5,75 ± 1,73   | 5.09 ± 1.66   | 4.03 ± 1      |
| 807.5029/C32:1  | 37.64 ± 4.87                 | 18.31 ± 4.05  | 34,09 ± 9,66  | 28,14 ± 8,04  | 34.62 ± 7.99  | 23.3 ± 5.7    |
| 805.4872/C32:2  | 13.04 ± 1.24                 | 5.23 ± 1.23   | 10,31 ± 2,33  | 9,22 ± 2,01   | 10.09 ± 1.75  | 7.35 ± 1.64   |
| 835.5342/C34:1  | 58.15 ± 7.45                 | 40.37 ± 11.86 | 55,76 ± 18,5  | 41,09 ± 10,71 | 55.14 ± 13.58 | 38.64 ± 9.53  |
| 833.5185/C34:2  | 14.73 ± 1.53                 | 7.9 ± 2.61    | 13,1 ± 4,06   | 10,33 ± 2,51  | 13.11 ± 3.06  | 9.28 ± 2.19   |
| 863.5655/C36:1  | 15.74 ± 1.54                 | 10.89 ± 3.98  | 15,29 ± 5,58  | 10,96 ± 2,52  | 14.44 ± 3.27  | 10.8 ± 2.35   |
| 861.5498/C36:2  | 1.37 ± 0.06                  | 0.99 ± 0.31   | 1,26 ± 0,45   | 0,9 ± 0,2     | 1.18 ± 0.24   | 0.92 ± 0.19   |
| <b>PE</b>       |                              |               |               |               |               |               |
| 606.414/C26:0   | 0.65 ± 0.01                  | 0 ± 0         | 0 ± 0         | 0 ± 0         | 0 ± 0         | 0 ± 0         |
| 634.4453/C28:0  | 0.73 ± 0.02                  | 0 ± 0         | 0,56 ± 0,13   | 0,49 ± 0,12   | 0.54 ± 0.06   | 0.47 ± 0.07   |
| 632.4296/C28:1  | 3.57 ± 0.4                   | 0 ± 0         | 2,6 ± 0,61    | 2,77 ± 0,89   | 3.11 ± 0.42   | 2.23 ± 0.49   |
| 660.4609/C30:1  | 4.9 ± 0.47                   | 0 ± 0         | 3,06 ± 0,69   | 3,62 ± 1,06   | 4 ± 0.43      | 3.03 ± 0.55   |
| 658.4453/C30:2  | 2.2 ± 0.4                    | 0 ± 0         | 1,17 ± 0,28   | 1,61 ± 0,57   | 1.9 ± 0.26    | 1.35 ± 0.34   |
| 688.4922/C32:1  | 19.14 ± 1.23                 | 5.41 ± 1.61   | 16,34 ± 3,8   | 13,46 ± 3,04  | 14.88 ± 1.84  | 12.48 ± 2.44  |
| 686.4766/C32:2  | 37.88 ± 6.66                 | 17.38 ± 3.42  | 29,59 ± 6,36  | 29,36 ± 8,28  | 35.51 ± 4.26  | 26.77 ± 6.61  |
| 716.5235/C34:1  | 16.34 ± 1.65                 | 5.97 ± 1.94   | 13 ± 4,72     | 10,18 ± 2,83  | 10.59 ± 1.5   | 10.15 ± 1.23  |
| 714.5079/C34:2  | 58.31 ± 7.03                 | 23.42 ± 5.13  | 50,17 ± 12,15 | 43,34 ± 9,29  | 57.73 ± 8.83  | 43.95 ± 10.36 |
| 742.5392/C36:2  | 13.33 ± 4.01                 | 4.74 ± 2.92   | 35 ± 27,9     | 10,07 ± 5,34  | 12.35 ± 5.41  | 11.95 ± 7.86  |
| <b>PS</b>       |                              |               |               |               |               |               |
| 732.4821/C32:1  | 24.41 ± 2.05                 | 9.66 ± 2.03   | 15,08 ± 4,08  | 16,61 ± 4,51  | 18.06 ± 2.52  | 12.68 ± 3     |
| 730.4664/C32:2  | 21.59 ± 2.16                 | 12.63 ± 2.03  | 16,25 ± 4,36  | 18,05 ± 5,27  | 21.47 ± 4.31  | 13.24 ± 4.21  |

|                                  |              |              |               |               |               |               |
|----------------------------------|--------------|--------------|---------------|---------------|---------------|---------------|
| 760.5134/C34:1                   | 29.86 ± 1.69 | 21.4 ± 7.29  | 19,22 ± 6,22  | 19,11 ± 4,33  | 21.8 ± 2.91   | 15.24 ± 3.5   |
| 758.4977/C34:2                   | 68.04 ± 6.34 | 63.41 ± 16.1 | 52,99 ± 15,47 | 51,66 ± 13,49 | 67.27 ± 12.28 | 43.25 ± 12.91 |
| 788.5447/C36:1                   | 1.9 ± 0.08   | 2.69 ± 0.43  | 1,9 ± 0,6     | 1,24 ± 0,12   | 0 ± 0         | 0 ± 0         |
| <b>PG</b>                        |              |              |               |               |               |               |
| 719.4868/C32:1                   | 0.84 ± 0.33  | 0 ± 0        | 1.73 ± 0.79   | 0.71 ± 0.5    | 0.72 ± 0.42   | 0.18 ± 0.06   |
| 747.5181/C34:1                   | 0.95 ± 0.31  | 0 ± 0        | 1.73 ± 0.77   | 0.75 ± 0.47   | 0.82 ± 0.45   | 0.3 ± 0.12    |
| <b>PA</b>                        |              |              |               |               |               |               |
| 643.4344/C32:2                   | 3.24 ± 0.45  | 0 ± 0        | 2.04 ± 0.87   | 1.96 ± 0.79   | 2.72 ± 0.91   | 1.67 ± 0.7    |
| 671.4657/C34:2                   | 3.2 ± 0.28   | 0 ± 0        | 3.09 ± 1.37   | 1.9 ± 0.63    | 2.83 ± 0.83   | 2 ± 0.7       |
| <b>CL</b>                        |              |              |               |               |               |               |
| 1261.8241/C58:3                  | 0.62 ± 0.05  | 0 ± 0        | 0.5 ± 0.18    | 0.42 ± 0.12   | 0.5 ± 0.09    | 0.33 ± 0.05   |
| 1263.8397/C58:2                  | 0.54 ± 0.03  | 0 ± 0        | 0 ± 0         | 0 ± 0         | 0.31 ± 0.02   | 0.26 ± 0.06   |
| 1289.8554/C60:3                  | 1.35 ± 0.12  | 0 ± 0        | 1.24 ± 0.45   | 0.89 ± 0.3    | 1.07 ± 0.27   | 0.76 ± 0.17   |
| 1291.871/C60:2                   | 0.84 ± 0.16  | 0 ± 0        | 1.08 ± 0.38   | 0.5 ± 0.04    | 0.85 ± 0.18   | 0.44 ± 0.1    |
| 1317.8867/C62:3                  | 1.22 ± 0.12  | 0 ± 0        | 1.08 ± 0.4    | 0.78 ± 0.26   | 0.94 ± 0.26   | 0.65 ± 0.16   |
| 1343.9023/C64:4                  | 1.39 ± 0.14  | 0 ± 0        | 1.3 ± 0.48    | 0.89 ± 0.32   | 1.1 ± 0.28    | 0.72 ± 0.17   |
| 1371.9336/C66:4                  | 2.56 ± 0.27  | 0 ± 0        | 2.7 ± 1       | 1.73 ± 0.58   | 2.12 ± 0.57   | 1.46 ± 0.37   |
| 1399.9649/C68:4                  | 2.33 ± 0.23  | 0.5 ± 0.21   | 2.39 ± 0.92   | 1.56 ± 0.48   | 1.92 ± 0.58   | 1.33 ± 0.33   |
| 1427.9962/C70:4                  | 0.88 ± 0.1   | 0 ± 0        | 0.89 ± 0.32   | 0.59 ± 0.15   | 0.72 ± 0.23   | 0.52 ± 0.13   |
| <b>ergosterol</b>                |              |              |               |               |               |               |
| 397.3459                         | 28.17 ± 5.61 | 24.45 ± 4.61 | 11.95 ± 6.15  | 20 ± 12.93    | 22.54 ± 5.98  | 27.65 ± 6.06  |
| <b>Chromatography peak areas</b> |              |              |               |               |               |               |
| <b>ergosterol</b>                |              |              |               |               |               |               |
| 397.3459                         | 44390 ± 7358 | 39465 ± 6204 | 31142 ± 18607 | 21443 ± 9362  | 36755 ± 8084  | 43658 ± 8191  |
| <b>IPC</b>                       |              |              |               |               |               |               |
| 952.6846/C42:0                   | 23809 ± 3506 | 6679 ± 2040  | 21481 ± 7033  | 12324 ± 5434  | 9134 ± 2505   | 10023 ± 2452  |
| <b>MIPC</b>                      |              |              |               |               |               |               |
| 1114.735/C42:0                   | 14005 ± 3680 | 2797 ± 697   | 16561 ± 6280  | 6231 ± 2545   | 5020 ± 2244   | 4784 ± 944    |

## Supplementary figures

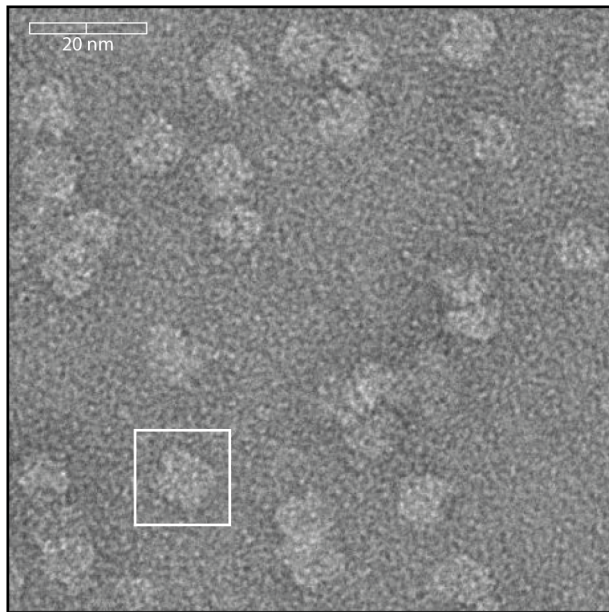

**Figure S1. Negative stain Cryo-EM of SMALPs.** SMALPs containing Lyp1-Ypet were visualized by negative stain cryo-EM. Scale bar is indicated on top left. The white box highlights one SMALP, which is approximately 10 nm.

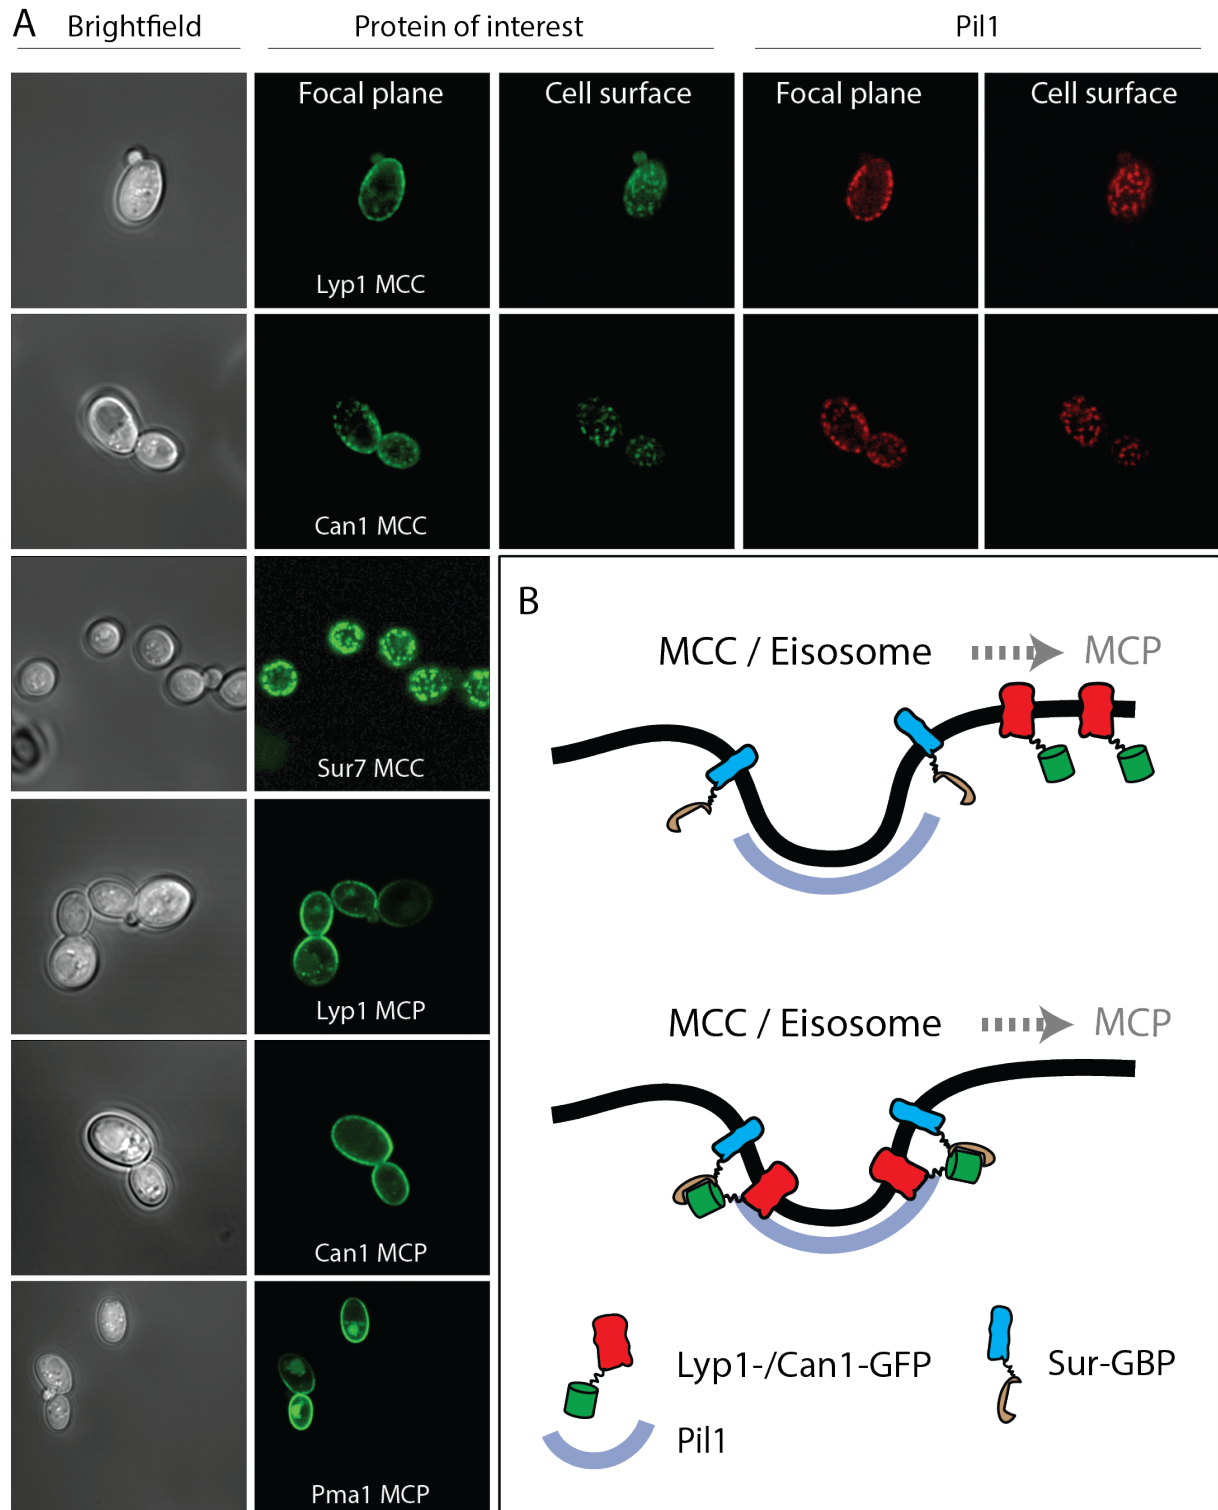

**Figure S2: Microscopy images of strains used in this study.** (A) Brightfield images depict *S. cerevisiae* visualized with visible light. (B) Proteins of interest are visualized by a Green Fluorescent Protein (Ypet) fused to Lyp1, Can1, Sur7 or Pma1. MCC = Micro Compartment of Can1; MCP = Micro Compartment of Pma1. Eisosomal protein Pil1 is visualized by a Red Fluorescent Protein (mCherry) and co-localizes with proteins in the MCC. B. Membrane protein trapping mechanism as designed by Rothbauer et al<sup>22</sup> and used by<sup>13</sup>. GFP binding protein (GBP) is fused to Sur7, and Lyp1 and Can1 are fused to GFP. Upon interaction between GBP and GFP, Can1 and Lyp1 are trapped in the MCC/Eisosome.

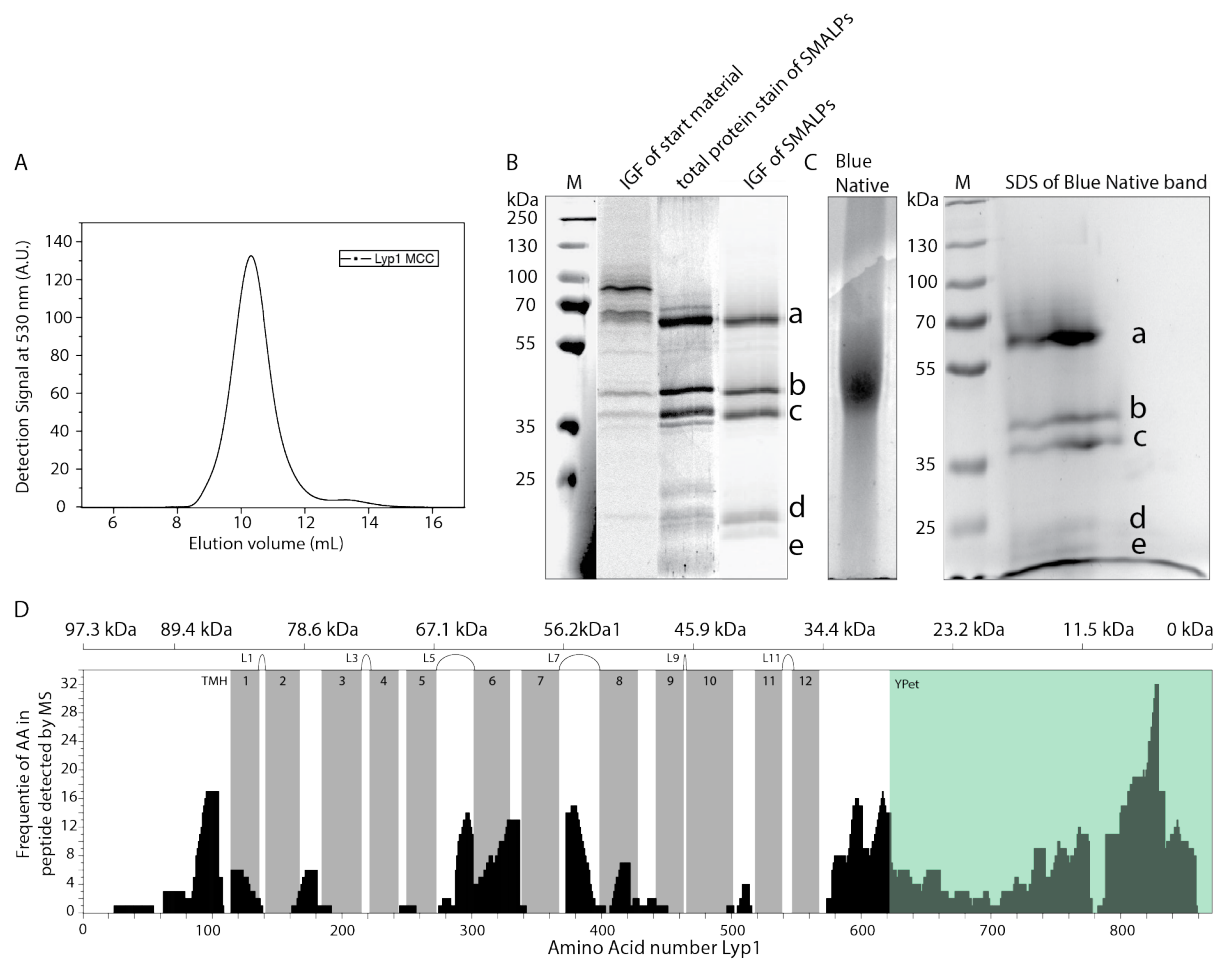

**Figure S3: Polyacrylamide gel electrophoresis and mass spectrometry analysis of Lyp1-Ypet SMALPs.** (A) Fluorescence Size-Exclusion Chromatography profile of Lyp1-Ypet SMALPs on a Superdex 200/30 GL column. (B) SDS-PAGE and (C) Blue Native-PAGE of Lyp1Ypet-SMALPs. M = Marker, IGF = In Gel Fluorescence of Ypet. Corresponding bands in SDS-PAGE and 2D native-denaturing gel electrophoresis are indicated by a-e. (D) Peptide coverage of Lyp1Ypet-SMALPs measured by Mass Spectrometry. TMH = Trans Membrane Helix, Gray bars indicate the position of each TMH. Extracellular loops are indicated as L<sub>x</sub>, where x = the loop number. The top scale indicates the molecular weight of randomized protein fractions in kDa (kiloDalton) starting from the C-terminal YPet, highlighted in green.

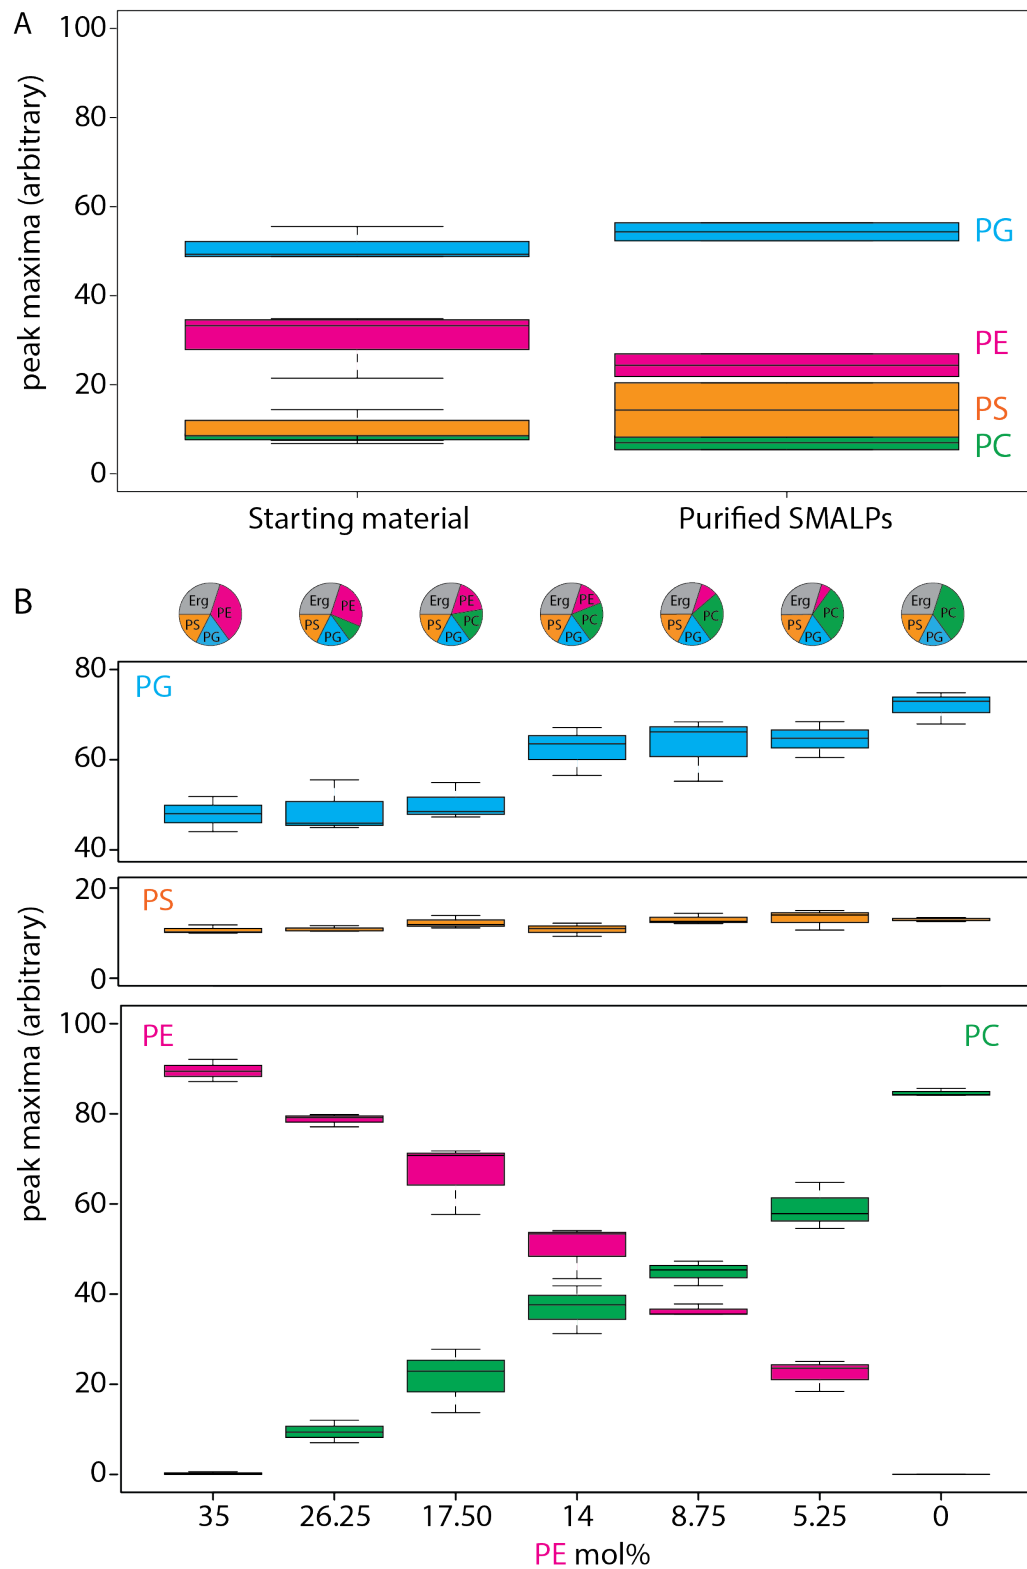

**Figure S4: Lipid analysis by mass spectrometry of proteo-liposomes.** Boxplot of peak areas of mass spectra corresponding to POPE, POPG, POPS and POPC, present in starting material and purified SMALPs (A) and in respective Lyp1 vesicles (B). Absolute quantities of lipids (mol%) taken for each lipid composition are shown in the pie-graphs above. Two-letter abbreviation and color-coding: PC = Phosphatidyl-Choline (green), PE = Phosphatidyl-Ethanolamine (magenta), PS = Phosphatidyl-Serine (orange) and PG = Phosphatidyl-glycerol (blue). Line within boxplot represents the median. Top and bottom represent the first and third quartile, respectively. Error bars are the minimal and maximal value. Number of experiments = 3 experimental replicates.



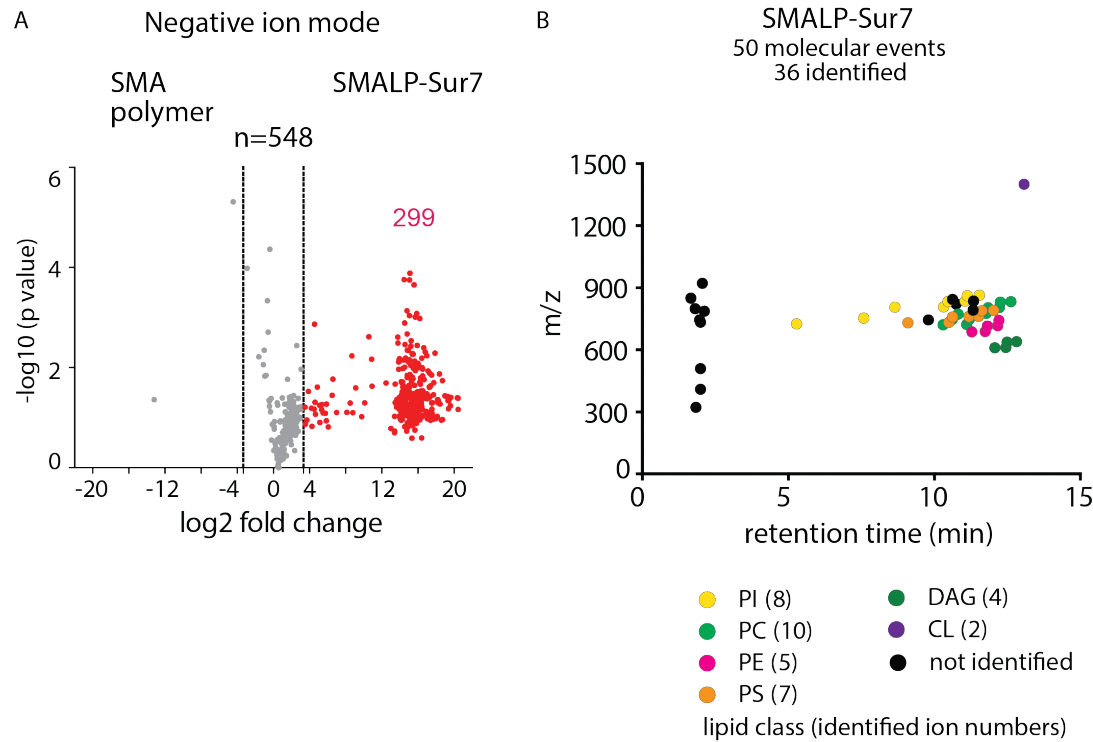

**Figure S5: Lipidomics of SMALP-Sur7.** (A) Three independently purified samples of SMALP-Sur7 were subjected to lipid extraction, normalization to 1  $\mu$ M of the input protein and subjected to reversed phase HPLC-QToF-ESI-MS in the negative ion mode. Among 548 ions detected the molecules were considered altered (red) when the signal changed 10-fold. P values were corrected using the Bonferroni method. (B) Using triage methods outlined in Fig. 2, we culled 36 ions with high intensity and lacking redundant detection as isotopes or alternate adducts, whose retention times are shown. Among these, 36 of ions were identified in 7 lipids classes using CID-MS and authentic standards. The number of lipids identified in each class is indicated in the parentheses.

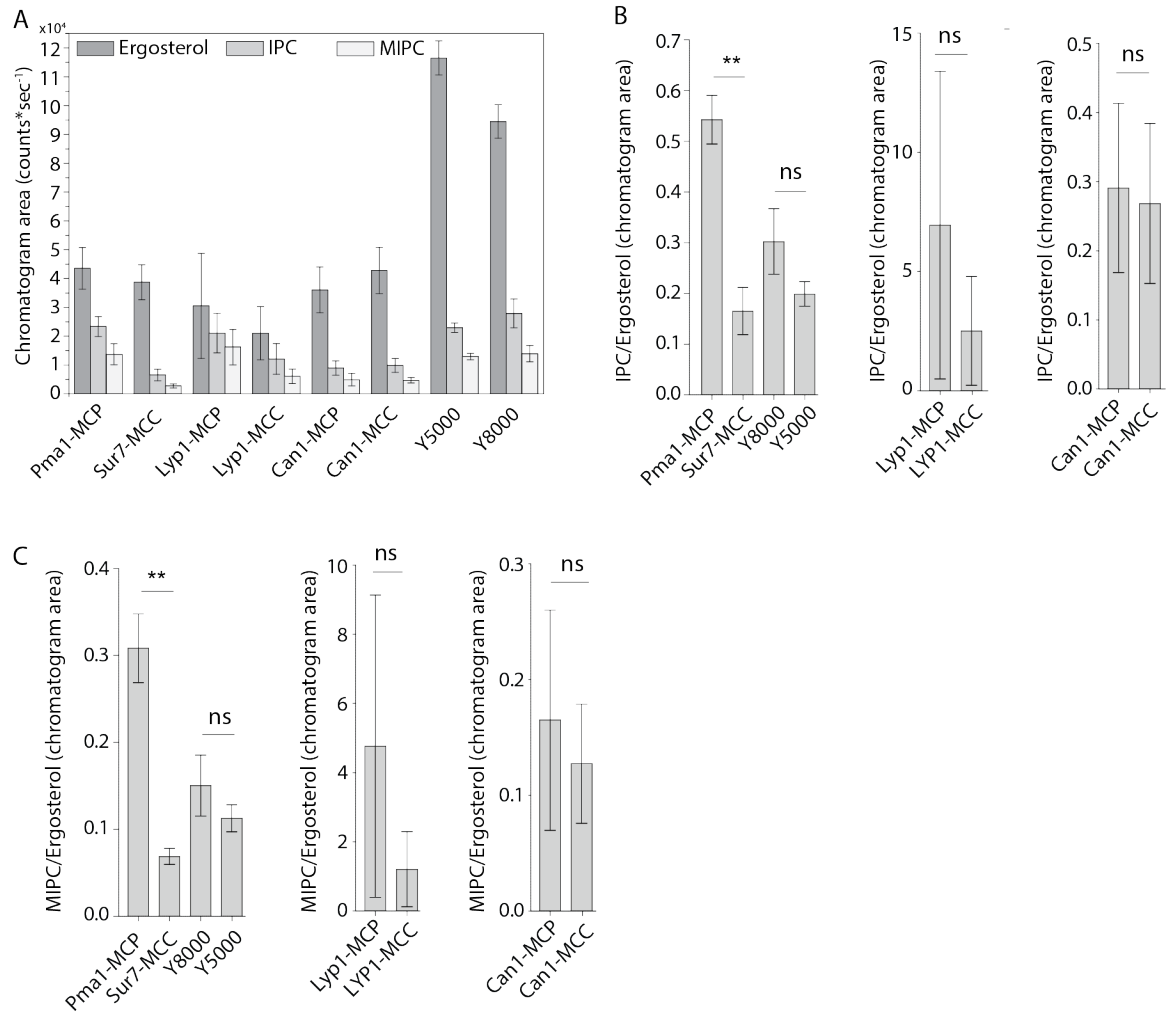

**Figure S6: Peak areas and ratios of ergosterol over sphingolipids.** (A) Peak areas measured in triplicate with standard error of the mean of the indicated lipid classes are shown according to protein markers that define membrane domains. (B) Ratio of IPC/Ergosterol (C) Ratio of MIPC/Ergosterol. The data are presented as mean +/- standard error. P value was calculated using Student's t-test. \*\*, P < 0.005, ns = not significant.

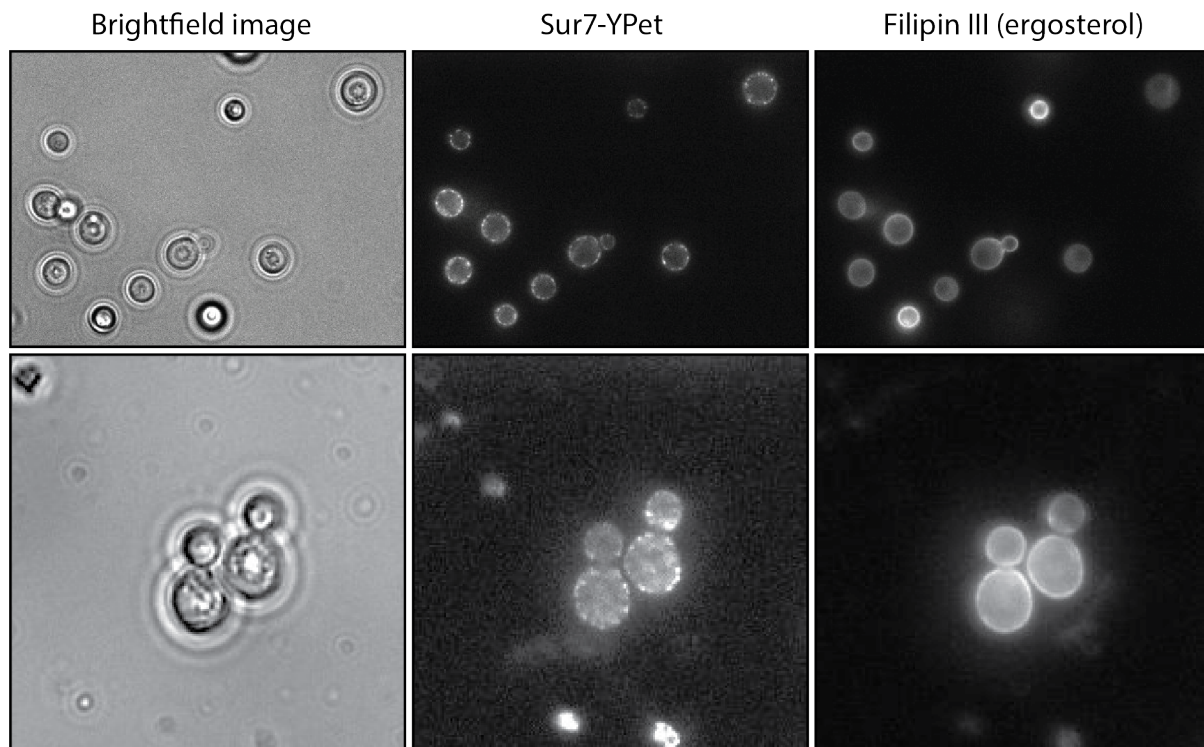

**Figure S7: Filipin staining of *S. cerevisiae*.** Images of *S. cerevisiae* cells strain Y5007, obtained with visible light (brightfield), showing MCC/eisosomes by 488 nm laser excitation of the MCC marker Sur7-Ypet; ergosterol is visualize by 365 nm excitation of Filipin III.

A

Linear regression fitting and equations

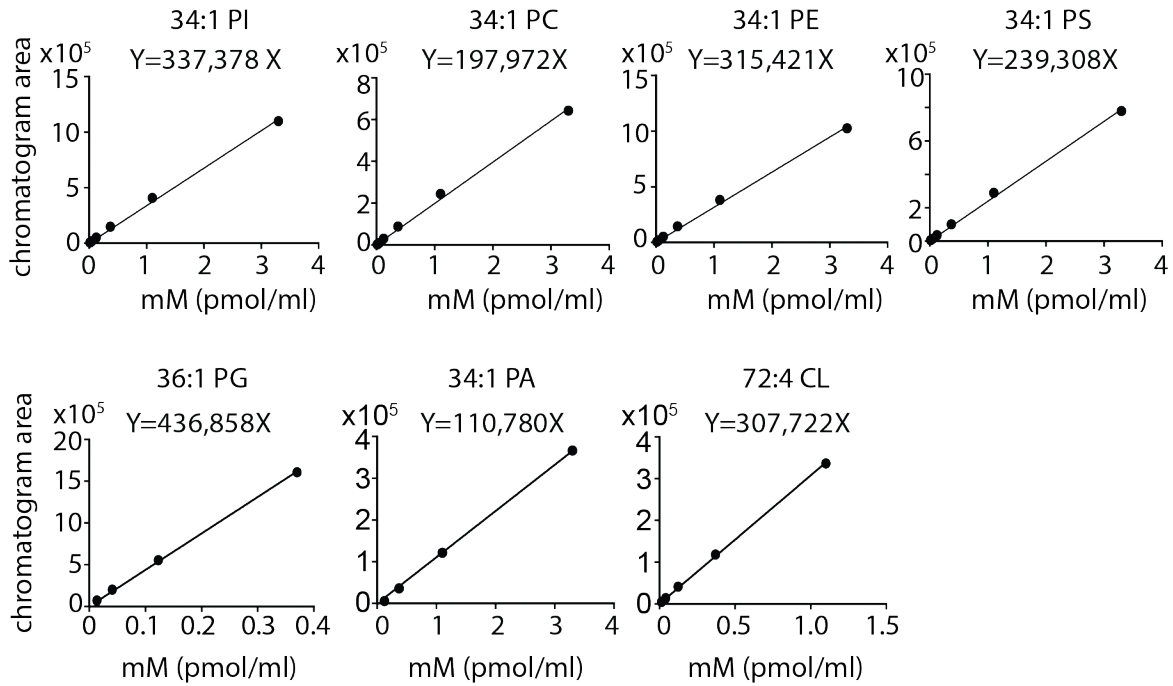

Non-linear fitting

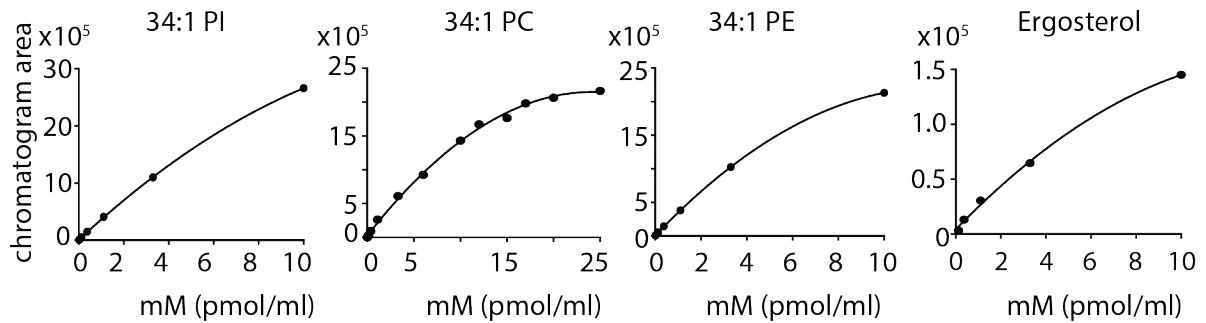

Second order polynomial equations

PI:  $Y = -10024X^2 + 365094X + 7979$  (when area is over 1,000,000)

PC:  $Y = -3641X^2 + 175777X + 27450$  (when area is over 600,000)

PE:  $Y = -14424X^2 + 356652X + 6947$  (when area is over 900,000)

Ergosterol:  $Y = -710X^2 + 21191X + 4159$

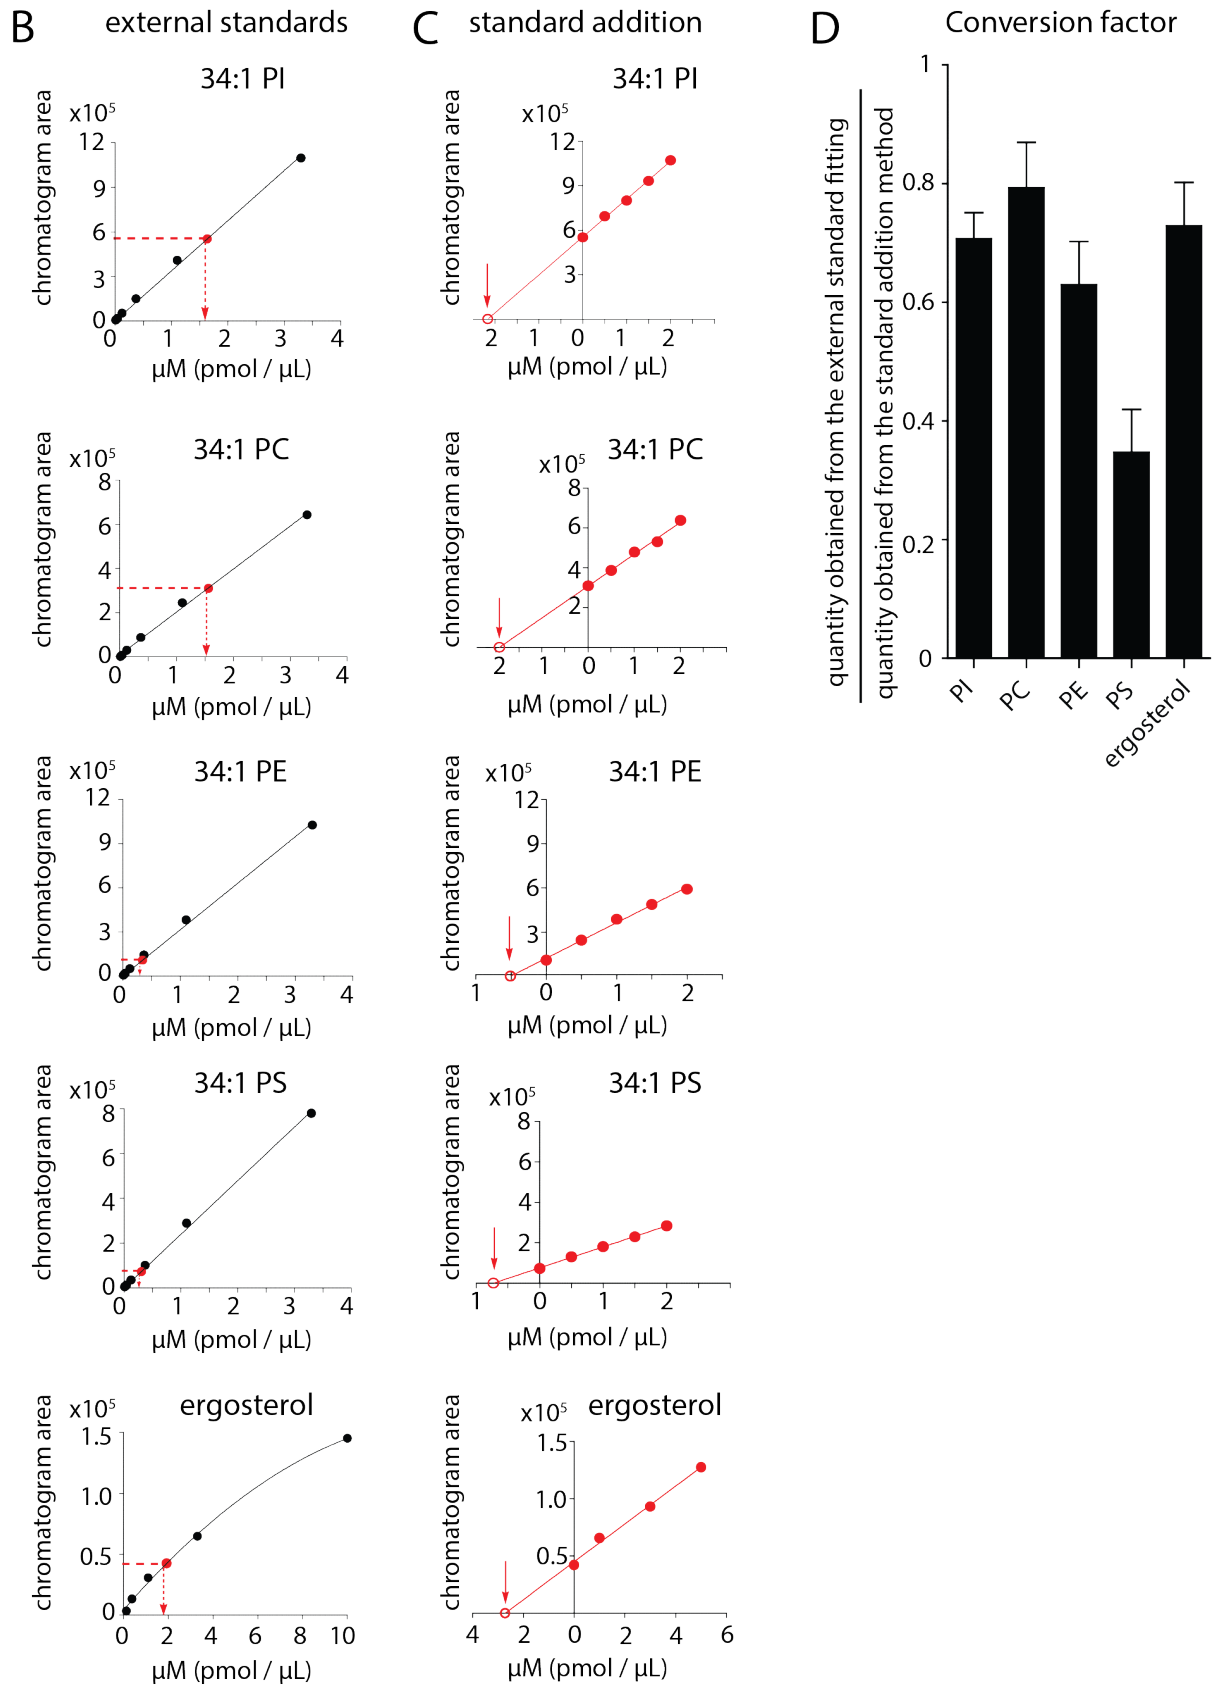

**Figure S8. Mass spectrometry-based quantitation using external and internal standards.** (A) For each standard, a series of known concentrations were prepared and analyzed by HPLC-MS. The ion chromatogram peak areas from known concentrations were used to generate external standard curves for determining the concentrations of the extracted lipids using linear curve fitting, and non-linear curve fitting for values with

zone suppression. (B) Lipid concentrations from SMALPs were estimated using the external standard curve fitting as indicated. (C) Lipid concentrations were also quantified using internal standards by the method of standard addition. Briefly, the lipid extracts were spiked with known concentrations of the synthetic standard, which has the same total fatty acyl chain length and number of unsaturation as compared to the lipid of interest. The ion chromatogram peak areas were plotted against the concentrations of the synthetic standard and extrapolated to the X-axis. (D) The conversion factors were defined as the ratio of the estimated quantity obtained from the external standard fitting to that from the standard addition method. The conversion factors are 0.71, 0.79, 0.63, 0.35, and 0.73 for PI, PC, PE, PS, and ergosterol, respectively. Final mass values are reported according to the estimated amount from the internal standard curve for one lead lipid in each class. The data are presented as mean  $\pm$  standard deviation of triplicate measurements (SD).

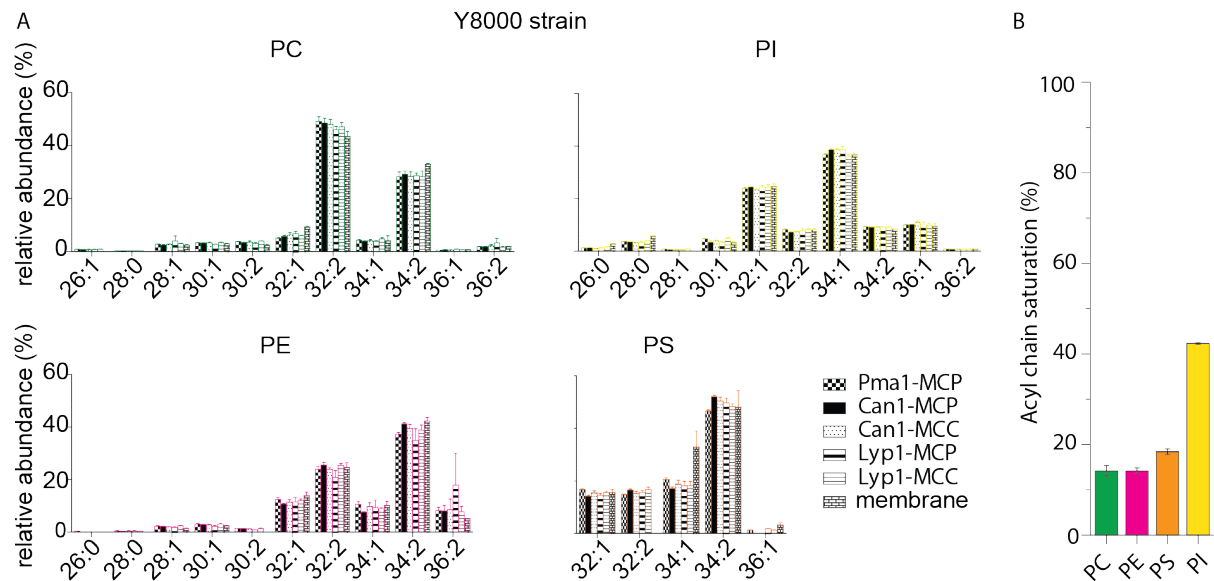

**Figure S9: Phospholipid composition of SMALP and membrane samples.** (A) Relative abundance of each phospholipid species as a function of acyl chain type for protein-SMALPs. Lyp1-MCC and Can1-MCC refer to SMALPs that have been obtained from proteins trapped in the MCC, using a GFP binding protein fused to the MCC resident Sur7. Lyp1-MCP and Can1-MCP refer to SMALPs that have been obtained from proteins that are not trapped in the MCC and thus correspond to MCP but a minor fraction from the MCC is present. (B) Total acyl chain saturation (%)/phospholipid species.



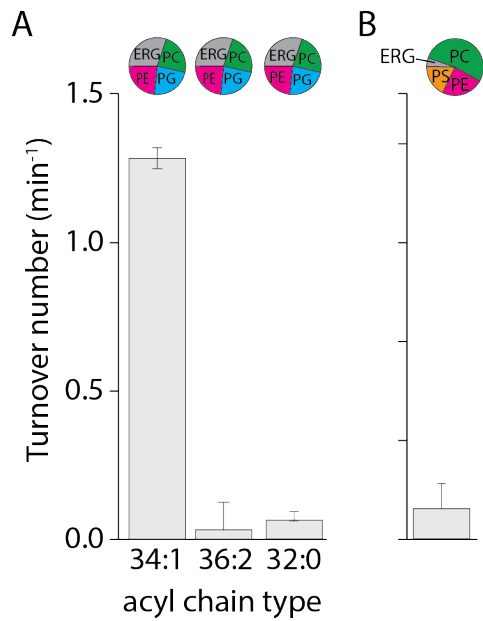

**Figure S10:** Lyp1 activity as a function of lipid composition. (A) Turnover number of Lyp1p in lipid mixtures with different acyl chains. (B) Turnover number of Lyp1p when measured in a lipid composition based on the lipidomics data from Fig. 3C, using C32:2 PC, C32:2 PE, and C34:1 PS and ergosterol. Triplicate values are shown with bars representing the standard error of the fit of  $n = 1$ ; variation between replicate experiments is within 20%.

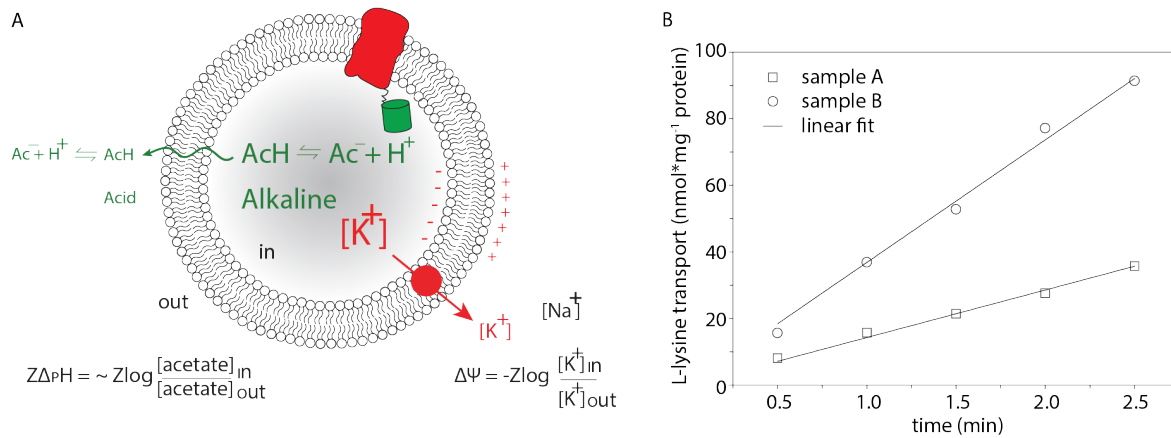

**Figure S11: Generation of proton motive force and lysine transport progress curve.** A. Schematic showing the generation of a membrane potential ( $\Delta\Psi$ , red arrow) by a valinomycin-mediated potassium diffusion potential and pH gradient ( $\Delta\text{pH}$ , green) formation by an acetate diffusion potential. Together the  $\Delta\Psi$  and  $\Delta\text{pH}$  form the proton motive force ( $\text{PMF} = \Delta\Psi - Z\Delta\text{pH}$ , where  $Z$  equals  $2.3RT/F$  and  $R$  and  $F$  are the gas and Faraday constant, respectively, and  $T$  is the absolute temperature). B. Transport of lysine by Lyp1-GFP-containing proteoliposomes and data fitting. Lyp1 activity is obtained from the slopes of such lines and converting the rates of transport into turnover numbers

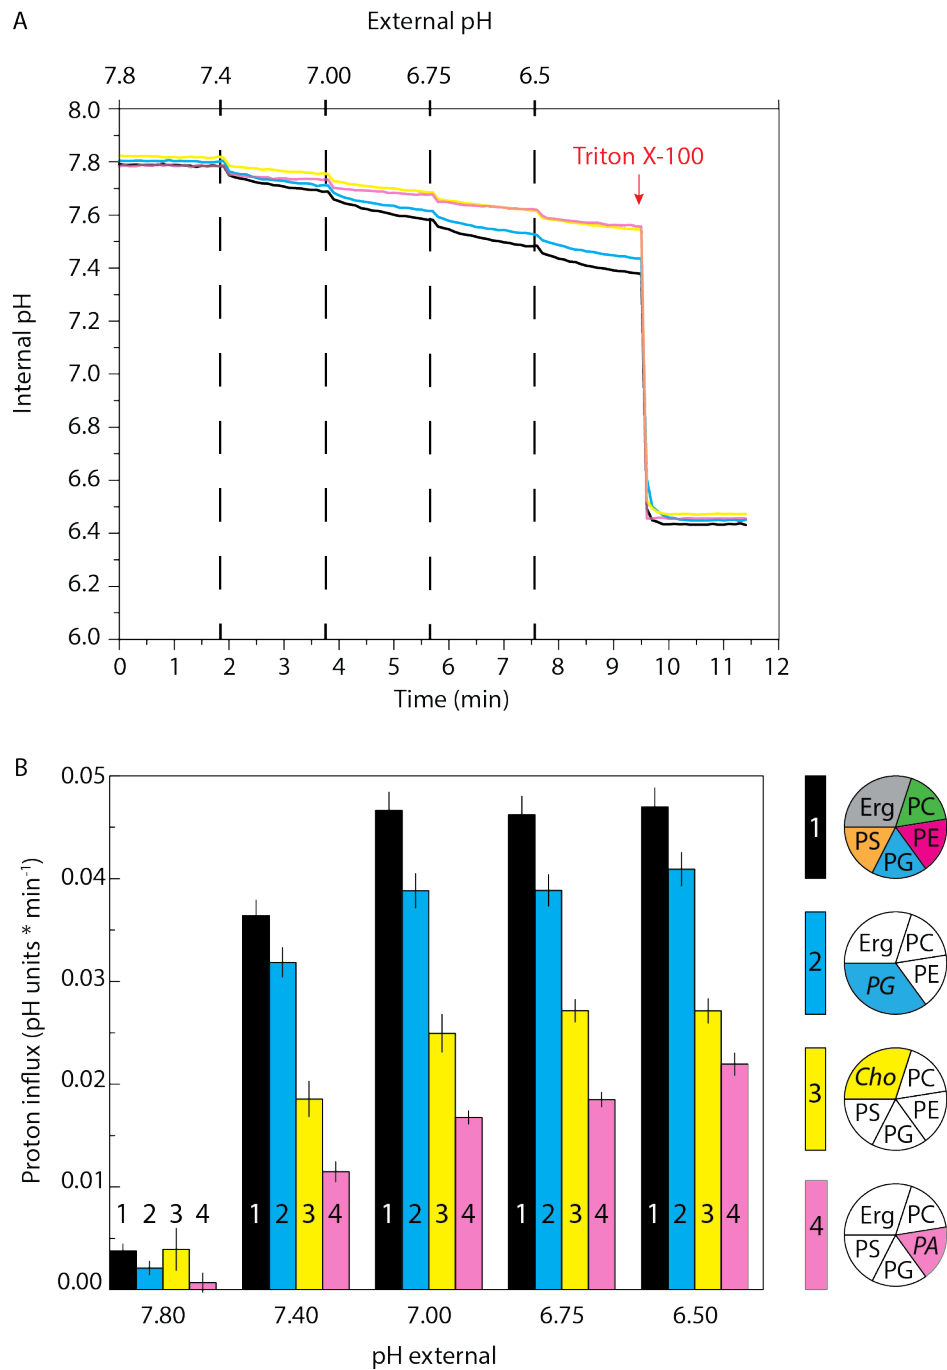

**Figure S12. Proton permeability of proteoliposomes.** (A) Internal pH is shown as a function of external pH and time for proteoliposomes composed of various lipids. The vesicles were prepared in 10 mM potassium-phosphate pH 7.8. Color code is: POPC/POPE/POPG/POPS/Ergosterol (17,5/17,5/17,5/17,5/30 mol%) = black; POPC/POPE/POPG/Ergosterol (17,5/17,5/35/30 mol%) = Blue; POPC/POPE/POPG/POPS/Cholesterol (17,5/17,5/17,5/17,5/30 mol%) = Yellow; POPC/POPG/POPS/POPA/Ergosterol (17,5/17,5/17,5/17,5/30 mol%) = Pink. The red-arrow indicates Triton X-100 addition, which solubilizes the proteoliposomes and releases pyranine. (B) Proton influx (pH units \* min<sup>-1</sup>) is shown as a function of external pH for each lipid composition. The proton influx was calculated from the slope of a linear fit of the data, where dashed lines in Panel A indicate the start and end points used for the fit. Result is representative of three experiments, and error bars are the standard error of the fit.
